# Supplementary material
Source: bioRxiv or medRxiv preprint supplement (https://www.biorxiv.org/highwire/filestream/96490/field_highwire_adjunct_files/0/204685-1.pdf)
Supplement: Supplementary file [file 204685-1.pdf]

Supplementary Information for: Detecting genome-wide  
directional effects of transcription factor binding on polygenic  
disease risk

April 29, 2018

**Contents**

|                                                              |           |
|--------------------------------------------------------------|-----------|
| <b>Supplementary Note</b>                                    | <b>2</b>  |
| Model and estimands . . . . .                                | 2         |
| Derivations and description of method . . . . .              | 3         |
| Computational considerations . . . . .                       | 4         |
| Additional interpretation of results . . . . .               | 5         |
| <b>Supplementary Tables</b>                                  | <b>6</b>  |
| <b>Supplementary Figures</b>                                 | <b>20</b> |
| <b>Appendix: the distribution of GWAS summary statistics</b> | <b>29</b> |

# Supplementary Note

## Model and estimands

### The model

Let  $M$  be the length of the genome. Given a genotype vector  $x \in \mathbb{R}^M$  of an individual sampled randomly from some population distribution and a vector  $\beta \in \mathbb{R}^M$  of causal SNP effects, we model the phenotype  $y$  with a standard linear model:

$$y|\beta, x \sim \mathcal{N}(x^T \beta, \sigma_e^2). \quad (1)$$

We assume that the genotypes are standardized in the population, i.e., that  $E(x_m) = 0$  and  $E(x_m^2) = 1$  for all SNPs  $m$ . We assume the same of the phenotype:  $E(y) = 0$  and  $E(y^2) = 1$ . Because our GWAS sample will be very large, these assumptions are for expositional convenience only.

The last ingredient of our model is the connection between  $\beta$  and the signed functional annotation of interest  $v \in \mathbb{R}^M$ . To get this, we assume that  $\beta$  is sampled from a distribution satisfying

$$E(\beta|v) = \mu v, \quad \text{cov}(\beta|v) = \sigma^2 I \quad (2)$$

where  $\mu$  and  $\sigma$  are scalars.

### The estimands

The first estimand we might be interested in is  $\mu$ , which would tell us the expected change in the per-normalized-genotype effect  $\beta_m$  of SNP  $m$  for every unit increase of  $v_m$ . However, this estimand depends on the units of  $v$ : if we multiply  $v$  by a constant  $c$ , then  $\mu$  is decreased by a factor of  $c$ . We therefore introduce a second estimand, the *functional correlation*  $r_f$ , which is defined as the genetic correlation between  $y$  and the 100%-heritable phenotype  $x^T v$ , i.e.,

$$r_f := \text{corr}(x^T \beta, x^T v). \quad (3)$$

Under our model,

$$\text{cov}(x^T \beta, x^T v) = E(\beta^T x x^T v) \quad (4)$$

$$= E(\beta)^T E(x x^T) v \quad (5)$$

$$= \mu v^T R v \quad (6)$$

where  $R = E(x x^T) \in \mathbb{R}^{M \times M}$  is the (signed) population LD matrix of the genotypes, and  $v$  is fixed and known. Since

$$\text{var}(x^T v) = E(v^T x x^T v) = v^T R v, \quad (7)$$

we obtain

$$r_f = \frac{\text{cov}(x^T \beta, x^T v)}{\sqrt{\text{var}(x^T \beta) \text{var}(x^T v)}} = \mu \sqrt{\frac{v^T R v}{h_g^2}}. \quad (8)$$

where  $h_g^2 = \text{var}(x^T \beta)$  is the SNP-heritability of the phenotype. Note that  $r_f$  can also be derived under a model in which  $v$  is also modeled as random and jointly distributed with  $\beta$ , in which case  $r_f$  is equal to a standard random-effects genetic correlation.<sup>1</sup> The choice to model  $v$  as fixed here arises from the fact that, since it is a complicated biological object, we wish to make as few assumptions as possible about its structure.

In addition to  $\mu$  and  $r_f$ , we might wish to know how much total phenotypic variance is explained by the signed contribution of  $v$  to  $\beta$ . This parameter,  $h_v^2$ , is defined by

$$h_v^2 := \text{var}(\mu x^T v) = \mu^2 v^T R v. \quad (9)$$

This is equal to the prediction  $r^2$  that we would obtain if we tried to predict  $y$  from  $x^T v$ . If we scale  $h_v^2$  by the total heritability of  $y$ , we obtain the proportion of heritability explained by the signed contribution of  $v$ , i.e.,

$$\frac{h_v^2}{h_g^2} = \frac{\mu^2 v^T R v}{h_g^2} = r_f^2. \quad (10)$$

We remark that for annotations with small support,  $r_f$  and its associated quantities should generally be expected to be small in magnitude. To see this, define  $h_{|v|}^2$  to be the prediction  $r^2$  that we would obtain if we predicted  $y$  from an optimal predictor that was constrained to be zero outside the support of  $v$ . By construction we have  $h_v^2 \leq h_{|v|}^2$ , but since  $h_{|v|}^2$  is the total phenotypic variance explained by SNPs in the support of  $v$ , this implies that  $r_f^2 \leq h_v^2/h_g^2 \leq h_{|v|}^2/h_g^2$  is at most the proportion of heritability explained by the SNPs in the support of  $v$ .

## Derivations and description of method

### Main derivation

Now suppose that  $N$  individuals  $x_1, \dots, x_N$  have been sampled i.i.d. from the population with corresponding phenotypes  $y_1, \dots, y_N$ , and that we are given the vector of marginal correlations between each SNP and the trait, i.e., we are given

$$\hat{\alpha} := \frac{1}{N} \sum_{n=1}^N x_n y_n \in \mathbb{R}^M. \quad (11)$$

It is easily shown that  $E(\hat{\alpha}|\beta) = R\beta$  (see Proposition 2 in Appendix), from which it follows that

$$E(\hat{\alpha}|v) = E(E(\hat{\alpha}|\beta, v)|v) \quad (12)$$

$$= E(R\beta|v) \quad (13)$$

$$= \mu Rv. \quad (14)$$

This means that naive regression of  $\hat{\alpha}$  on the *signed LD profile*  $Rv$  of  $v$  is an unbiased estimator of  $\mu$ . However, ordinary least-squares is the best-powered when the observations have i.i.d. noise. In this regression, each SNP provides one observation  $(\hat{\alpha}_m, (Rv)_m)$ , but under our model the covariance of  $\hat{\alpha}_m$  and  $\hat{\alpha}_{m'}$  given  $Rv$  is non-zero. Therefore, if we can model this covariance structure properly, we should be able to use generalized least-squares to reduce variance and increase power. In Theorem 1 of Appendix, we show that indeed

$$\text{cov}(\hat{\alpha}|v) \approx \sigma^2 R^2 + \frac{R}{N} =: \Omega. \quad (15)$$

The default version of signed LD profile regression estimates  $\Omega$  from the reference panel and the chi-squared statistics of the GWAS in question and then performs generalized least-squares using a pseudo-inverse of  $\Omega$  to de-couple correlated errors among SNPs. It can be shown that if a) all causal SNPs are typed, b) sample size is infinite, and c)  $R$  is invertible, this method is equivalent to estimating  $\beta$  via  $R^{-1}\hat{\alpha}$  and then regressing this estimate on  $v$  to obtain  $\mu$ , which is the optimal approach in that setting. Note that because we generate P-values for hypothesis testing empirically (see below), we are guaranteed that our generalized least-squares scheme will remain well-calibrated even if our estimate of the matrix  $\Omega$  is inaccurate due to, e.g., mis-match between the reference panel and the study population.

The point estimate arising from the regression described above is an estimate  $\hat{\mu}$  of  $\mu$ . To obtain an estimate of  $r_f$ , we plug into Equation 3, estimating  $h_g^2$  using the ‘‘aggregate estimator’’ of heritability<sup>2</sup> given by

$$\hat{h}_g^2 := \frac{|\hat{\alpha}|_2^2 - \frac{M}{N}}{\frac{1}{M_{5,50}} \sum_m \widehat{\ell}_m} \quad (16)$$

where  $|\hat{\alpha}|_2$  is the  $\ell_2$ -norm of  $\hat{\alpha}$ ,  $\widehat{\ell}_m$  is a reference-panel-based estimate of the LD-score  $\ell_m := \sum_{m'} R_{mm'}^2$  of SNP  $m$ , and  $M_{5,50}$  is the number of causal SNPs with MAF between 5% and 50%. Equation 3 also has a  $v^T Rv$  term; for convenience we approximate this term by  $v^T v$ ; our simulations show that we do not suffer from this approximation, and it is empirically quite accurate for our annotations (data not shown).

To estimate  $h_v^2/h_g^2$ , we use the jackknife to estimate the sampling variance  $\widehat{\tau}^2$  of the statistic  $\widehat{r}_f$ , and then report  $\widehat{r}_f^2 - \widehat{\tau}^2$ . Though this is an exactly unbiased estimate of  $h_v^2$  only if  $\widehat{r}_f$  is normally distributed and the jackknife provides an accurate estimate of the sampling variance of  $\mu$ , our simulations show that it is very close to unbiased in practice. Note that while we use a jackknife estimate of the variance of  $\widehat{r}_f$  to

estimate  $r_f^2$ , this is not how we compute P-values for null hypothesis testing; for details of null hypothesis testing, see below.

To estimate  $h_v^2$ , we simply multiply our estimate of  $r_f^2 = h_v^2/h_g^2$  by our estimate of  $h_g^2$ .

### Untyped SNPs

Typically, our set of potentially causal SNPs is much larger than the set of SNPs for which we have GWAS summary statistics. Signed LD profile works well in such scenarios: it simply uses only the entries of  $Rv$  corresponding to typed SNPs in the regression. Because drastically different sets of typed SNPs require estimation of  $\Omega$  anew, we estimate  $\Omega$  assuming that all non-MHC HapMap3 SNPs are typed, and then restrict the summary statistics for each trait analyzed to non-MHC HapMap3 SNPs only.

### Null hypothesis testing

To test the null hypothesis  $H_0 : \mu = 0$  (or, equivalently,  $H_0 : r_f = 0$ ), we split the genome into approximately 300 blocks of approximately the same size with the block boundaries constrained to fall on estimated recombination hotspots.<sup>3</sup> We then define the null distribution of our statistic as the distribution arising from independently multiplying  $v$  by an independent random sign for each block. We perform this empirical sign-flipping many times to obtain an approximation of the null distribution and corresponding P-values. Our use of sign-flipping ensures that any true positives found by our method are the result of genuine first-moment effects; if in contrast we estimated standard errors using least-squares theory or a re-sampling method such as the jackknife or bootstrap, our method might inappropriately reject the null hypothesis only because the variance of  $\beta$  is higher in parts of the genome where  $Rv$  is large in magnitude. This would make our method susceptible to confounding due to unsigned enrichments, as might arise from the co-localization of TF binding sites with enriched regulatory elements such as enhancer regions. Additionally, the fact that we flip the signs of SNPs in each block together ensures that our null distribution preserves any potential relationship of our annotation to the LD structure of the genome. In choosing how many blocks to use for this procedure, we took into account that i) the fewer blocks we use the fewer assumptions we make about LD structure and the faster we can compute P-values, and ii) the more blocks we use the higher the precision of the P-values that we can obtain. Our choice to use 300 blocks is a compromise between these two considerations.

### Controlling for covariates and the signed background model

Given a signed covariate  $u \in \mathbb{R}^M$ , we can perform inference on the signed effect of  $v$  conditional on  $u$ . This is done by first regressing  $Ru$  out of  $\hat{\alpha}$  and out of  $Rv$  using the generalized least-squares method outlined above, and then proceeding as usual with the residuals of  $\hat{\alpha}$  and  $Rv$ . This can be done simultaneously for multiple covariates  $u$ .

Unless stated otherwise, all analyses in this paper are done controlling for a “signed background model” consisting of 5 annotations  $u^1, \dots, u^5$ , defined by

$$u_m^i = \mathbf{1} \{ \text{MAF}_m \text{ is in } i\text{-th quintile} \} \sqrt{2\text{MAF}_m(1 - \text{MAF}_m)^{1+\alpha_s}} \quad (17)$$

where  $\text{MAF}_m$  is the minor allele frequency of SNP  $m$  and  $\alpha_s$  is a parameter describing the MAF-dependence of the signed effect of minor alleles on phenotype. Based on the literature on MAF-dependence of the unsigned effects  $\text{var}(\beta_m)$ , we set  $\alpha_s = -0.3$ .<sup>4</sup>

### Computational considerations

We model the LD matrix  $R$  as being block-diagonal, with the block endpoints defined by recombination hotspots.<sup>3</sup> This allows both more statistically efficient estimation of the true  $Rv$  as well as more efficient computation.

For estimating  $\Omega$ , we use the above block-diagonal decomposition, together with a truncated singular value decomposition applied in each block. Specifically, we store enough singular vectors to capture 95% of the spectrum of each LD block. This is a pre-processing step that need only be carried out once per reference panel, and the relevant outputs of this step for the 1000G Phase 3 Europeans can be downloaded from our website.

## Additional interpretation of results

We discuss other associations in Table 1 that are not discussed in the main text. Two of these associations support and refine emerging theories of disease, while two are previously unknown. We begin by discussing the two associations that build on previous knowledge. First, we detected a positive association between genome-wide binding of ELF1 and Crohn’s disease (CD). ELF1 is a hematopoietic and immune regulator<sup>5</sup> that, as mentioned in the main text, lies in a genome-wide significant Crohn’s disease locus in a GWAS of a Japanese population,<sup>6,7</sup> along with 10 other protein-coding genes within 500kb. Our top significant MSigDB enrichment for this relationship was a set of genes differentially expressed following treatment with the drug MRL24, which is a PPAR $\gamma$  agonist. PPAR $\gamma$  has been linked to regulation of the colonic antimicrobial response and inflammatory bowel disease in several studies.<sup>8</sup> Moreover, PPAR $\gamma$  agonists have been shown to have clinical efficacy in treating inflammatory bowel disease,<sup>9</sup> with some agents in current clinical use theorized to act in part via this mechanism.<sup>9</sup>

Second, we detected a positive relationship between genome-wide binding of ETS1 and Crohn’s disease. ETS1 is known to regulate genes involved in immunity<sup>5</sup> and, as mentioned in the main text, the *ETS1* gene was recently found to lie in a locus associated with CD<sup>10</sup> and IBD,<sup>11</sup> along with 6 other protein-coding genes within 500kb. The top significant MSigDB enrichments for this relationship point to transcriptional programs associated with EI24 and MYC, both of which play important roles in autophagy<sup>12-14</sup> (EI24 is also known as “autophagy-associated transmembrane protein”). These gene-set enrichments suggest that ETS1 may play a role in mediating the well-known relationship between autophagy and CD.<sup>15</sup>

We next discuss the two associations that have not previously been observed from GWAS data. First, we detected a positive association between genome-wide binding of FOS and HDL. In mice, liver-specific overexpression of the *FOS* gene leads to increased intrahepatic cholesterol and modulation of genes in metabolic pathways connected to cholesterol and fatty acid biosynthesis.<sup>16</sup> FOS has also been shown to be up-regulated when HeLa cells are grown in a sterol-depleted medium designed to activate cellular sterol homeostatic machinery,<sup>17</sup> and the AP-1 complex that it forms has been shown to be down-regulated by high-cholesterol diet in model organisms.<sup>18</sup> A different mechanism is suggested by the fact that in humans, a mutation in the *FOS* gene is associated with congenital generalized lipodystrophy, a phenotype characterized by absence of adipocytes.<sup>19</sup> Our top MSigDB gene-set enrichment for this association was genes regulated by NF- $\kappa$ B in response to TNF stimulation. This is potentially consistent with emerging relationships between NF- $\kappa$ B and FOS,<sup>20</sup> as well as between TNF and HDL.<sup>21</sup>

Second, we detected a positive association between E2F1 and Crohn’s disease. E2F1 has roles in immunity, and E2f1-deficient mice challenged with lipopolysaccharide exhibit an attenuated inflammatory response.<sup>22</sup> Additionally, chronic colonic inflammation is associated with release of E2F1 inhibition and activation of E2F1 target genes.<sup>23</sup> Finally, activity of RB, an upstream regulator of the E2F1 pathway, is a highly sensitive and specific test for distinguishing Crohn’s disease from ulcerative colitis in some cases, with RB activity being elevated in Crohn’s disease.<sup>24</sup>

**Note: suggestively significant CTCF associations** The relationships we detected between CTCF binding and both lupus and eczema (see main text) raised the question of whether any other traits had sub-significant signals of this sort. We investigated this question, with a primary goal of identifying specifically auto-immune diseases with this property and a secondary goal of identifying any traits with this property. We determined that beyond lupus and eczema no other auto-immune trait exhibited a suggestive (per-trait FDR < 25%) association with CTCF binding. However, we note a suggestive positive association between CTCF binding and red blood cell count ( $p = 2.7 \times 10^{-4}$ ; FDR = 11%).

## Supplementary Tables

**Table S1: Summary information about ChIP-seq annotations used in analyses.**  $v$  denotes annotation,  $M$  denotes the total number of SNPs in the reference panel,  $|v|_0$  denotes the number of SNPs with non-zero values of  $v$ , and  $|v|_2$  denotes the 2-norm of  $v$ .

| Lab   | Cell line | Experiment | BASSET AUPRC | $ v _0$ | $ v _0/M$ (%) | $ v _2$ |
|-------|-----------|------------|--------------|---------|---------------|---------|
| HAIB  | SKNSHRA   | CTCF       | 0.880098     | 18646   | 0.19          | 13.20   |
| BROAD | NHA       | CTCF       | 0.869841     | 27912   | 0.28          | 12.68   |
| HAIB  | A549      | CTCFSC5916 | 0.866840     | 21517   | 0.22          | 12.73   |
| UW    | NB4       | CTCF       | 0.866150     | 25419   | 0.25          | 13.23   |
| UW    | HRE       | CTCF       | 0.864149     | 28846   | 0.29          | 13.64   |
| HAIB  | A549      | CTCFSC5916 | 0.863801     | 21011   | 0.21          | 13.41   |
| UTA   | HUVEC     | CTCF       | 0.861944     | 21000   | 0.21          | 14.18   |
| BROAD | HUVEC     | CTCF       | 0.859699     | 29576   | 0.30          | 12.68   |
| UW    | HFF       | CTCF       | 0.859124     | 25034   | 0.25          | 11.61   |
| UW    | RPTEC     | CTCF       | 0.858547     | 44995   | 0.45          | 17.53   |
| BROAD | HMEC      | CTCF       | 0.858372     | 27488   | 0.27          | 12.58   |
| UW    | HASP      | CTCF       | 0.858100     | 29663   | 0.30          | 14.75   |
| UW    | GM12878   | CTCF       | 0.858056     | 25981   | 0.26          | 13.11   |
| UW    | A549      | CTCF       | 0.857446     | 35097   | 0.35          | 15.54   |
| UW    | HFFMYC    | CTCF       | 0.857241     | 38004   | 0.38          | 14.93   |
| UTA   | GM12878   | CTCF       | 0.856204     | 24907   | 0.25          | 15.67   |
| UW    | GM06990   | CTCF       | 0.855834     | 33120   | 0.33          | 14.51   |
| UW    | HMF       | CTCF       | 0.854815     | 35825   | 0.36          | 16.13   |
| UW    | HCFAA     | CTCF       | 0.854650     | 26214   | 0.26          | 13.36   |
| UW    | GM12874   | CTCF       | 0.854489     | 24822   | 0.25          | 12.73   |
| UW    | HEK293    | CTCF       | 0.854351     | 31140   | 0.31          | 15.48   |
| UTA   | HEPG2     | CTCF       | 0.853428     | 17547   | 0.18          | 13.62   |
| UW    | MCF7      | CTCF       | 0.852776     | 40427   | 0.40          | 17.06   |
| UW    | NHEK      | CTCF       | 0.852312     | 31784   | 0.32          | 13.27   |
| HAIB  | H1HESC    | CTCFSC5916 | 0.852040     | 30644   | 0.31          | 18.33   |
| UW    | HVMF      | CTCF       | 0.851735     | 33859   | 0.34          | 14.79   |
| UW    | GM12875   | CTCF       | 0.851254     | 26436   | 0.26          | 13.21   |
| UW    | HCT116    | CTCF       | 0.851195     | 36485   | 0.36          | 15.57   |
| UW    | GM12865   | CTCF       | 0.850843     | 29599   | 0.30          | 14.14   |
| HAIB  | HEPG2     | CTCFSC5916 | 0.850684     | 29285   | 0.29          | 17.25   |
| UW    | HRPE      | CTCF       | 0.850296     | 33503   | 0.34          | 16.27   |
| BROAD | H1HESC    | CTCF       | 0.849116     | 47350   | 0.47          | 20.96   |
| UW    | GM12872   | CTCF       | 0.847288     | 34212   | 0.34          | 15.09   |
| SYDH  | H1HESC    | RAD21      | 0.846410     | 35780   | 0.36          | 17.12   |
| UW    | BE2C      | CTCF       | 0.846211     | 41476   | 0.41          | 15.80   |
| UW    | HPF       | CTCF       | 0.845889     | 29441   | 0.29          | 14.13   |
| UW    | NHLF      | CTCF       | 0.845237     | 24971   | 0.25          | 11.64   |
| BROAD | NHDFAD    | CTCF       | 0.844702     | 33708   | 0.34          | 14.84   |
| UW    | SAEC      | CTCF       | 0.843178     | 27722   | 0.28          | 13.59   |
| BROAD | HSMMT     | CTCF       | 0.843109     | 39253   | 0.39          | 14.10   |
| BROAD | GM12878   | CTCF       | 0.842508     | 39752   | 0.40          | 14.28   |
| BROAD | NHLF      | CTCF       | 0.842394     | 30215   | 0.30          | 12.99   |
| UW    | HELAS3    | CTCF       | 0.842036     | 24028   | 0.24          | 11.95   |
| UW    | GM12864   | CTCF       | 0.841830     | 33480   | 0.33          | 14.86   |

Continued on next page

| Lab   | Cell line | Experiment     | BASSET AUPRC | $ v _0$ | $ v _0/M$ (%) | $ v _2$ |
|-------|-----------|----------------|--------------|---------|---------------|---------|
| UW    | SKNSHRA   | CTCF           | 0.841702     | 26551   | 0.27          | 13.96   |
| UW    | HCM       | CTCF           | 0.839966     | 42907   | 0.43          | 15.57   |
| UTA   | GLIOBLA   | CTCF           | 0.839859     | 37388   | 0.37          | 18.58   |
| UTA   | K562      | CTCF           | 0.838050     | 27610   | 0.28          | 16.98   |
| UW    | HUVEC     | CTCF           | 0.837666     | 23780   | 0.24          | 12.51   |
| UW    | K562      | CTCF           | 0.835751     | 30678   | 0.31          | 14.23   |
| UW    | GM12873   | CTCF           | 0.834805     | 36107   | 0.36          | 15.83   |
| UW    | HMEC      | CTCF           | 0.834803     | 36092   | 0.36          | 14.96   |
| BROAD | HEPG2     | CTCF           | 0.834631     | 36924   | 0.37          | 14.72   |
| BROAD | HSMM      | CTCF           | 0.833446     | 34415   | 0.34          | 15.13   |
| UW    | HEPG2     | CTCF           | 0.831350     | 31010   | 0.31          | 15.52   |
| UW    | HPAF      | CTCF           | 0.830419     | 40688   | 0.41          | 16.57   |
| UW    | AG09309   | CTCF           | 0.830321     | 31862   | 0.32          | 13.56   |
| BROAD | HELAS3    | CTCF           | 0.828969     | 49347   | 0.49          | 15.31   |
| UW    | BJ        | CTCF           | 0.828852     | 32555   | 0.33          | 13.39   |
| BROAD | NHEK      | CTCF           | 0.828230     | 37413   | 0.37          | 14.19   |
| UW    | HEE       | CTCF           | 0.828217     | 33823   | 0.34          | 13.55   |
| UW    | HAC       | CTCF           | 0.828210     | 36662   | 0.37          | 13.83   |
| UTA   | HELAS3    | CTCF           | 0.828109     | 25915   | 0.26          | 16.07   |
| UW    | AG04450   | CTCF           | 0.827331     | 32761   | 0.33          | 13.88   |
| UTA   | PROGFIB   | CTCF           | 0.826811     | 22840   | 0.23          | 14.38   |
| HAIB  | ECC1      | CTCFC          | 0.826438     | 15251   | 0.15          | 8.81    |
| BROAD | DND41     | CTCF           | 0.824320     | 38541   | 0.39          | 13.81   |
| HAIB  | H1HESC    | RAD21          | 0.823698     | 47411   | 0.47          | 22.20   |
| SYDH  | IMR90     | CTCFB          | 0.820777     | 26982   | 0.27          | 13.99   |
| UW    | AG09319   | CTCF           | 0.820556     | 33669   | 0.34          | 14.46   |
| UW    | HBMEC     | CTCF           | 0.819613     | 41152   | 0.41          | 16.62   |
| UW    | WI38      | CTCF           | 0.819609     | 25725   | 0.26          | 10.62   |
| UTA   | H1HESC    | CTCF           | 0.818739     | 22472   | 0.22          | 15.80   |
| UTA   | A549      | CTCF           | 0.817553     | 32700   | 0.33          | 17.81   |
| UW    | AG10803   | CTCF           | 0.817006     | 29517   | 0.30          | 13.69   |
| BROAD | OSTEOBL   | CTCF           | 0.816996     | 53644   | 0.54          | 16.04   |
| UW    | HCPE      | CTCF           | 0.816798     | 42276   | 0.42          | 16.83   |
| SYDH  | GM12878   | CTCFSC15914C20 | 0.815991     | 30691   | 0.31          | 15.49   |
| UTA   | MCF7      | CTCF           | 0.815467     | 49073   | 0.49          | 22.63   |
| BROAD | K562      | CTCF           | 0.815351     | 52427   | 0.52          | 15.60   |
| UW    | WERIRB1   | CTCF           | 0.815231     | 30972   | 0.31          | 15.58   |
| UTA   | MCF7      | CTCF           | 0.814259     | 37438   | 0.37          | 18.94   |
| UW    | AOAF      | CTCF           | 0.810198     | 25402   | 0.25          | 12.89   |
| UW    | CACO2     | CTCF           | 0.808883     | 28146   | 0.28          | 12.68   |
| UW    | AG04449   | CTCF           | 0.808085     | 24368   | 0.24          | 14.42   |
| SYDH  | K562      | CTCFB          | 0.807922     | 34266   | 0.34          | 15.56   |
| HAIB  | HEPG2     | RAD21          | 0.806753     | 31414   | 0.31          | 14.66   |
| UW    | NHDFNEO   | CTCF           | 0.805912     | 34150   | 0.34          | 13.07   |
| UTA   | FIBROBL   | CTCF           | 0.802580     | 24917   | 0.25          | 14.54   |
| HAIB  | K562      | CTCFC          | 0.800330     | 29034   | 0.29          | 14.24   |
| SYDH  | HEPG2     | RAD21          | 0.795326     | 24061   | 0.24          | 10.74   |
| SYDH  | GM12878   | RAD21          | 0.793772     | 22165   | 0.22          | 9.93    |
| UTA   | GM19240   | CTCF           | 0.787095     | 24254   | 0.24          | 14.44   |
| UTA   | GM19238   | CTCF           | 0.784621     | 28109   | 0.28          | 15.19   |

Continued on next page

| Lab  | Cell line | Experiment     | BASSET AUPRC | $ v _0$ | $ v _0/M$ (%) | $ v _2$ |
|------|-----------|----------------|--------------|---------|---------------|---------|
| UTA  | NHEK      | CTCF           | 0.782123     | 28029   | 0.28          | 15.70   |
| HAIB | T47D      | CTCFSC5916     | 0.780735     | 20119   | 0.20          | 9.44    |
| UTA  | GM12891   | CTCF           | 0.776692     | 23165   | 0.23          | 13.77   |
| SYDH | GM12878   | SMC3AB9263     | 0.775055     | 22604   | 0.23          | 9.36    |
| HAIB | GM12878   | RAD21          | 0.773313     | 19232   | 0.19          | 10.90   |
| UTA  | MCF7      | CTCF           | 0.771586     | 32289   | 0.32          | 17.54   |
| SYDH | IMR90     | RAD21          | 0.771096     | 21035   | 0.21          | 10.62   |
| UTA  | GM19239   | CTCF           | 0.770649     | 21921   | 0.22          | 12.29   |
| UTA  | GM12892   | CTCF           | 0.764533     | 27003   | 0.27          | 14.40   |
| SYDH | K562      | SMC3AB9263     | 0.764408     | 17833   | 0.18          | 8.29    |
| HAIB | K562      | RAD21          | 0.762473     | 17349   | 0.17          | 10.54   |
| UW   | HL60      | CTCF           | 0.760612     | 11834   | 0.12          | 6.43    |
| SYDH | HEPG2     | MAFKAB50322    | 0.756003     | 36764   | 0.37          | 16.31   |
| SYDH | HEK293    | POL2           | 0.750713     | 11423   | 0.11          | 2.57    |
| HAIB | SKNSHRA   | RAD21          | 0.748781     | 34221   | 0.34          | 14.81   |
| UTA  | MCF7      | CTCF           | 0.744677     | 33804   | 0.34          | 16.07   |
| UTA  | A549      | POL2           | 0.743474     | 13317   | 0.13          | 2.99    |
| UTA  | MCF7      | CTCF           | 0.737779     | 31703   | 0.32          | 15.80   |
| SYDH | HELAS3    | RAD21          | 0.732822     | 23726   | 0.24          | 9.90    |
| UTA  | GLIOBLA   | POL2           | 0.730622     | 12444   | 0.12          | 2.89    |
| SYDH | A549      | RAD21          | 0.726374     | 15727   | 0.16          | 8.17    |
| SYDH | GM10847   | POL2           | 0.725536     | 11162   | 0.11          | 2.82    |
| SYDH | K562      | RAD21          | 0.719791     | 11216   | 0.11          | 5.92    |
| UTA  | HUVEC     | POL2           | 0.710965     | 9848    | 0.10          | 2.62    |
| SYDH | GM18526   | POL2           | 0.704244     | 15927   | 0.16          | 3.59    |
| SYDH | HELAS3    | SMC3AB9263     | 0.703877     | 25410   | 0.25          | 9.28    |
| SYDH | MCF10AES  | CFOS           | 0.695666     | 52371   | 0.52          | 14.00   |
| SYDH | GM15510   | POL2           | 0.692228     | 18641   | 0.19          | 3.92    |
| SYDH | GM12878   | ZNF143166181AP | 0.691695     | 16121   | 0.16          | 6.52    |
| SYDH | MCF10AES  | CFOS           | 0.689921     | 41778   | 0.42          | 11.91   |
| SYDH | HEPG2     | SMC3AB9263     | 0.683574     | 21539   | 0.22          | 8.17    |
| SYDH | MCF10AES  | CFOS           | 0.678308     | 49334   | 0.49          | 12.33   |
| SYDH | MCF10AES  | CFOS           | 0.672546     | 37719   | 0.38          | 10.03   |
| SYDH | H1HESC    | ZNF143         | 0.665846     | 25229   | 0.25          | 8.50    |
| SYDH | GM18951   | POL2           | 0.662339     | 23305   | 0.23          | 4.19    |
| SYDH | K562      | NFYB           | 0.661296     | 9570    | 0.10          | 3.91    |
| HAIB | GM12878   | GABP           | 0.660956     | 5625    | 0.06          | 2.43    |
| HAIB | ECC1      | POL2           | 0.657365     | 19849   | 0.20          | 3.32    |
| UTA  | MCF7      | POL2           | 0.652882     | 18193   | 0.18          | 3.05    |
| HAIB | HEPG2     | TAF1           | 0.650101     | 16181   | 0.16          | 2.94    |
| SYDH | K562      | IRF1           | 0.649426     | 12976   | 0.13          | 3.16    |
| SYDH | K562      | POL2           | 0.647737     | 16308   | 0.16          | 3.35    |
| SYDH | GM12892   | POL2           | 0.645338     | 23295   | 0.23          | 4.12    |
| SYDH | HEPG2     | MAFKSC477      | 0.643218     | 24770   | 0.25          | 9.07    |
| UTA  | MCF7      | POL2           | 0.642949     | 15229   | 0.15          | 2.94    |
| SYDH | NB4       | POL2           | 0.641432     | 16158   | 0.16          | 3.31    |
| SYDH | K562      | POL2           | 0.640277     | 15063   | 0.15          | 2.99    |
| SYDH | K562      | POL2           | 0.635903     | 17161   | 0.17          | 3.22    |
| SYDH | K562      | ZNF143         | 0.634772     | 23343   | 0.23          | 7.50    |
| SYDH | HEPG2     | MAFFM8194      | 0.634067     | 25009   | 0.25          | 8.93    |

Continued on next page



| Lab   | Cell line | Experiment   | BASSET AUPRC | $ v _0$ | $ v _0/M$ (%) | $ v _2$ |
|-------|-----------|--------------|--------------|---------|---------------|---------|
| HAIB  | GM12878   | ELF1SC631    | 0.631869     | 20946   | 0.21          | 5.37    |
| HAIB  | H1HESC    | TAF1         | 0.627966     | 21837   | 0.22          | 3.08    |
| HAIB  | HEPG2     | GABP         | 0.627412     | 9290    | 0.09          | 3.07    |
| SYDH  | HEPG2     | CEBPB        | 0.625633     | 34970   | 0.35          | 14.15   |
| SYDH  | K562      | POL2         | 0.624054     | 15843   | 0.16          | 3.14    |
| SYDH  | IMR90     | MAFK         | 0.620883     | 25154   | 0.25          | 8.57    |
| SYDH  | GM18505   | POL2         | 0.618220     | 24625   | 0.25          | 3.97    |
| UTA   | HELAS3    | POL2         | 0.617348     | 19384   | 0.19          | 3.25    |
| UTA   | PROGFIB   | POL2         | 0.617226     | 14761   | 0.15          | 2.91    |
| SYDH  | GM19099   | POL2         | 0.606235     | 22799   | 0.23          | 4.01    |
| SYDH  | GM19193   | POL2         | 0.604915     | 24050   | 0.24          | 3.91    |
| SYDH  | K562      | POL2         | 0.602457     | 15110   | 0.15          | 2.90    |
| HAIB  | SKNSH     | TAF1         | 0.601160     | 11185   | 0.11          | 2.76    |
| SYDH  | HCT116    | POL2         | 0.598756     | 17455   | 0.17          | 2.72    |
| SYDH  | PBDE      | POL2         | 0.596470     | 22492   | 0.22          | 3.29    |
| HAIB  | K562      | TAF1         | 0.594640     | 13400   | 0.13          | 3.11    |
| UTA   | MCF7      | POL2         | 0.587761     | 14677   | 0.15          | 2.73    |
| SYDH  | MCF10AES  | POL2         | 0.581721     | 22034   | 0.22          | 3.45    |
| BROAD | K562      | PLU1         | 0.578953     | 19126   | 0.19          | 2.78    |
| SYDH  | IMR90     | CEBPB        | 0.577892     | 44228   | 0.44          | 14.66   |
| HAIB  | A549      | CREB1SC240   | 0.576054     | 13155   | 0.13          | 3.07    |
| UTA   | K562      | POL2         | 0.575441     | 19966   | 0.20          | 3.30    |
| HAIB  | GM12878   | PU1          | 0.574256     | 27757   | 0.28          | 9.34    |
| SYDH  | GM12878   | POL2         | 0.573648     | 23803   | 0.24          | 3.93    |
| UTA   | GM12878   | POL2         | 0.572056     | 17552   | 0.18          | 3.00    |
| HAIB  | GM12878   | NRSF         | 0.568899     | 5888    | 0.06          | 3.82    |
| BROAD | K562      | PHF8A301772A | 0.566331     | 27457   | 0.27          | 2.88    |
| SYDH  | RAJI      | POL2         | 0.564973     | 21621   | 0.22          | 3.36    |
| SYDH  | HEPG2     | POL2         | 0.563102     | 18212   | 0.18          | 2.71    |
| HAIB  | K562      | YY1          | 0.558414     | 10704   | 0.11          | 2.79    |
| HAIB  | A549      | POL2         | 0.555363     | 31308   | 0.31          | 3.68    |
| HAIB  | A549      | POL2         | 0.553825     | 29976   | 0.30          | 3.58    |
| HAIB  | GM12878   | YY1SC281     | 0.553334     | 26103   | 0.26          | 5.34    |
| SYDH  | GM12878   | POL2         | 0.552473     | 11117   | 0.11          | 2.41    |
| HAIB  | GM12891   | PU1          | 0.551608     | 28912   | 0.29          | 9.97    |
| HAIB  | GM12878   | TAF1         | 0.551273     | 12105   | 0.12          | 2.98    |
| SYDH  | A549      | CEBPB        | 0.551046     | 26389   | 0.26          | 9.72    |
| SYDH  | HUVEC     | CFOS         | 0.550936     | 42775   | 0.43          | 7.57    |
| HAIB  | A549      | TAF1         | 0.550319     | 11038   | 0.11          | 2.08    |
| HAIB  | GM12892   | POL2         | 0.548292     | 23439   | 0.23          | 3.42    |
| HAIB  | HELAS3    | TAF1         | 0.547530     | 14406   | 0.14          | 2.81    |
| HAIB  | HEPG2     | POL24H8      | 0.547414     | 18782   | 0.19          | 3.01    |
| SYDH  | HEPG2     | JUND         | 0.545643     | 23439   | 0.23          | 5.68    |
| SYDH  | HELAS3    | HAE2F1       | 0.544870     | 9314    | 0.09          | 1.47    |
| SYDH  | HELAS3    | POL2         | 0.543185     | 29222   | 0.29          | 3.11    |
| HAIB  | GM12892   | TAF1         | 0.542027     | 8249    | 0.08          | 2.23    |
| SYDH  | K562      | MAZAB85725   | 0.541193     | 33691   | 0.34          | 6.34    |
| SYDH  | MCF10AES  | POL2         | 0.541022     | 25900   | 0.26          | 3.53    |
| SYDH  | H1HESC    | MAFK         | 0.540650     | 8262    | 0.08          | 2.09    |
| HAIB  | A549      | ETS1         | 0.539878     | 6635    | 0.07          | 2.60    |

Continued on next page

| Lab  | Cell line | Experiment  | BASSET AUPRC | $ v _0$ | $ v _0/M$ (%) | $ v _2$ |
|------|-----------|-------------|--------------|---------|---------------|---------|
| SYDH | GM12891   | POL2        | 0.538971     | 24040   | 0.24          | 3.79    |
| HAIB | K562      | GABP        | 0.535852     | 12143   | 0.12          | 3.59    |
| HAIB | K562      | E2F6        | 0.535787     | 20429   | 0.20          | 2.89    |
| HAIB | HEPG2     | YY1SC281    | 0.535256     | 17564   | 0.18          | 3.27    |
| HAIB | HCT116    | POL24H8     | 0.534399     | 29439   | 0.29          | 4.18    |
| SYDH | HELAS3    | ELK4        | 0.533836     | 6984    | 0.07          | 2.00    |
| HAIB | U87       | NRSF        | 0.533645     | 10740   | 0.11          | 3.53    |
| SYDH | H1HESC    | TBP         | 0.533586     | 17933   | 0.18          | 3.13    |
| SYDH | GM12878   | ELK112771   | 0.532557     | 5585    | 0.06          | 1.90    |
| UTA  | H1HESC    | POL2        | 0.528904     | 15666   | 0.16          | 2.28    |
| HAIB | HEPG2     | POL2        | 0.527603     | 26528   | 0.27          | 3.51    |
| HAIB | GM12878   | PMLSC71910  | 0.523565     | 21007   | 0.21          | 3.16    |
| HAIB | HEPG2     | NRSF        | 0.522989     | 11697   | 0.12          | 3.82    |
| HAIB | K562      | ELF1SC631   | 0.521651     | 20676   | 0.21          | 5.35    |
| SYDH | GM12878   | NFYB        | 0.521437     | 14633   | 0.15          | 3.58    |
| HAIB | GM12891   | TAF1        | 0.520083     | 10825   | 0.11          | 2.70    |
| HAIB | HUVEC     | POL2        | 0.519612     | 24168   | 0.24          | 3.11    |
| HAIB | A549      | ELF1        | 0.516848     | 8792    | 0.09          | 2.24    |
| HAIB | PFSK1     | FOXP2       | 0.514938     | 15908   | 0.16          | 2.79    |
| SYDH | MCF10AES  | E2F4        | 0.514526     | 12559   | 0.13          | 2.58    |
| SYDH | HELAS3    | NFYA        | 0.513807     | 5483    | 0.05          | 1.98    |
| SYDH | K562      | HMG3        | 0.513410     | 18241   | 0.18          | 2.26    |
| SYDH | HELAS3    | NFYB        | 0.512540     | 6653    | 0.07          | 2.22    |
| SYDH | HUVEC     | CJUN        | 0.510520     | 20080   | 0.20          | 4.26    |
| HAIB | HUVEC     | POL24H8     | 0.509722     | 35149   | 0.35          | 4.72    |
| HAIB | HEPG2     | ELF1SC631   | 0.509441     | 13489   | 0.13          | 3.73    |
| SYDH | K562      | MAFKAB50322 | 0.508412     | 13001   | 0.13          | 3.37    |
| HAIB | GM12891   | POL2        | 0.505543     | 17852   | 0.18          | 2.78    |
| SYDH | H1HESC    | USF2        | 0.503572     | 5202    | 0.05          | 2.27    |
| HAIB | H1HESC    | GABP        | 0.501419     | 5292    | 0.05          | 1.53    |
| SYDH | K562      | E2F4        | 0.500739     | 7900    | 0.08          | 1.74    |
| SYDH | K562      | MAFF        | 0.499311     | 17035   | 0.17          | 4.41    |
| SYDH | IMR90     | POL2        | 0.499139     | 21099   | 0.21          | 2.57    |
| HAIB | H1HESC    | USF1        | 0.498243     | 16631   | 0.17          | 6.39    |
| HAIB | K562      | MAX         | 0.494249     | 42934   | 0.43          | 5.98    |
| SYDH | HELAS3    | POL2S2      | 0.492278     | 14434   | 0.14          | 2.32    |
| HAIB | H1HESC    | NRSF        | 0.491469     | 8454    | 0.08          | 5.74    |
| SYDH | HELAS3    | MAZAB85725  | 0.489070     | 16019   | 0.16          | 2.24    |
| HAIB | HELAS3    | NRSF        | 0.488734     | 6360    | 0.06          | 4.97    |
| HAIB | GM12891   | YY1SC281    | 0.487772     | 11490   | 0.11          | 2.73    |
| HAIB | HEPG2     | SIN3AK20    | 0.487522     | 17653   | 0.18          | 2.53    |
| HAIB | HELAS3    | POL2        | 0.487393     | 28715   | 0.29          | 3.64    |
| HAIB | K562      | POL2        | 0.486825     | 36854   | 0.37          | 3.37    |
| SYDH | HEPG2     | MAX         | 0.486481     | 11059   | 0.11          | 1.92    |
| HAIB | GM12878   | SP1         | 0.486260     | 15317   | 0.15          | 3.48    |
| SYDH | HEPG2     | POL2        | 0.484689     | 20477   | 0.20          | 2.83    |
| HAIB | GM12892   | POL24H8     | 0.483645     | 20500   | 0.21          | 2.59    |
| HAIB | K562      | ETS1        | 0.483398     | 10444   | 0.10          | 2.37    |
| SYDH | GM12878   | MAZAB85725  | 0.483322     | 22411   | 0.22          | 3.16    |
| SYDH | HELAS3    | CJUN        | 0.478779     | 16492   | 0.16          | 2.98    |

Continued on next page

| Lab      | Cell line | Experiment     | BASSET AUPRC | $ v _0$ | $ v _0/M$ (%) | $ v _2$ |
|----------|-----------|----------------|--------------|---------|---------------|---------|
| SYDH     | K562      | CFOS           | 0.478299     | 5481    | 0.05          | 2.17    |
| SYDH     | HEPG2     | MXI1           | 0.477728     | 21106   | 0.21          | 3.26    |
| HAIB     | H1HESC    | POL2           | 0.476246     | 26239   | 0.26          | 2.59    |
| SYDH     | K562      | CEBPB          | 0.474134     | 28505   | 0.29          | 9.12    |
| HAIB     | U87       | POL24H8        | 0.473137     | 23582   | 0.24          | 3.29    |
| SYDH     | K562      | MAX            | 0.471849     | 29516   | 0.30          | 4.86    |
| HAIB     | A549      | GABP           | 0.471447     | 13855   | 0.14          | 3.02    |
| SYDH     | HELAS3    | CHD2           | 0.471053     | 19320   | 0.19          | 3.33    |
| SYDH     | K562      | E2F6           | 0.470723     | 16483   | 0.16          | 2.33    |
| HAIB     | GM12878   | EGR1           | 0.468941     | 10841   | 0.11          | 2.08    |
| SYDH     | HUVEC     | MAX            | 0.466519     | 6425    | 0.06          | 1.93    |
| HAIB     | GM12878   | RUNX3SC101553  | 0.466113     | 56840   | 0.57          | 8.61    |
| HAIB     | GM12878   | USF1           | 0.465793     | 7272    | 0.07          | 2.57    |
| HAIB     | K562      | USF1           | 0.464692     | 12871   | 0.13          | 4.61    |
| BROAD    | K562      | RBBP5A300109A  | 0.463994     | 20083   | 0.20          | 1.84    |
| SYDH     | K562      | TBP            | 0.463143     | 17767   | 0.18          | 3.22    |
| HAIB     | K562      | SIN3AK20       | 0.463116     | 8897    | 0.09          | 1.77    |
| SYDH     | K562      | CMYC           | 0.462873     | 32161   | 0.32          | 5.06    |
| SYDH     | A549      | MAX            | 0.461439     | 9266    | 0.09          | 1.72    |
| SYDH     | HELAS3    | MAX            | 0.458337     | 29171   | 0.29          | 4.12    |
| HAIB     | HEPG2     | USF1           | 0.457588     | 12887   | 0.13          | 3.90    |
| SYDH     | K562      | CCNT2          | 0.456697     | 21697   | 0.22          | 2.94    |
| SYDH     | GM12878   | MXI1           | 0.456679     | 19923   | 0.20          | 2.77    |
| HAIB     | GM12892   | YY1            | 0.456003     | 12740   | 0.13          | 2.83    |
| HAIB     | GM12891   | POL24H8        | 0.455418     | 17929   | 0.18          | 2.50    |
| SYDH     | HELAS3    | CEBPB          | 0.450802     | 39105   | 0.39          | 7.92    |
| SYDH     | NB4       | MAX            | 0.449059     | 28193   | 0.28          | 4.72    |
| SYDH     | HEPG2     | TBP            | 0.448004     | 13778   | 0.14          | 2.88    |
| HAIB     | HCT116    | YY1SC281       | 0.447206     | 9601    | 0.10          | 2.36    |
| UTA      | MCF7      | CMYC           | 0.446932     | 17429   | 0.17          | 2.52    |
| SYDH     | K562      | CMYC           | 0.446684     | 26346   | 0.26          | 3.95    |
| HAIB     | SKNSHRA   | YY1SC281       | 0.445929     | 13128   | 0.13          | 2.71    |
| HAIB     | H1HESC    | YY1SC281       | 0.445242     | 15591   | 0.16          | 2.65    |
| SYDH     | HELAS3    | JUND           | 0.444612     | 22640   | 0.23          | 4.23    |
| SYDH     | HEPG2     | MAZAB85725     | 0.444409     | 12934   | 0.13          | 1.88    |
| UTA      | MCF7      | CMYC           | 0.443654     | 24235   | 0.24          | 3.51    |
| HAIB     | A549      | USF1           | 0.441291     | 7881    | 0.08          | 2.59    |
| SYDH     | HEPG2     | CJUN           | 0.440671     | 8890    | 0.09          | 1.91    |
| HAIB     | SKNSHRA   | USF1SC8983     | 0.439829     | 12682   | 0.13          | 3.64    |
| SYDH     | GM12878   | MAX            | 0.439437     | 14531   | 0.15          | 2.21    |
| HAIB     | K562      | POL24H8        | 0.438629     | 19971   | 0.20          | 3.52    |
| HAIB     | PFSK1     | NRSF           | 0.435981     | 9928    | 0.10          | 4.63    |
| SYDH     | H1HESC    | SIN3ANB6001263 | 0.433869     | 26283   | 0.26          | 2.93    |
| UTA      | HEPG2     | POL2           | 0.432243     | 21612   | 0.22          | 2.23    |
| HAIB     | A549      | FOSL2          | 0.430795     | 23494   | 0.24          | 3.95    |
| HAIB     | SKNSH     | POL24H8        | 0.427949     | 22879   | 0.23          | 3.35    |
| SYDH     | HUVEC     | POL2           | 0.427119     | 11883   | 0.12          | 1.94    |
| HAIB     | K562      | YY1            | 0.426097     | 19380   | 0.19          | 3.54    |
| UCHICAGO | K562      | EFOS           | 0.425453     | 6855    | 0.07          | 1.91    |
| SYDH     | H1HESC    | CHD2           | 0.424343     | 6252    | 0.06          | 1.25    |

Continued on next page

| Lab  | Cell line | Experiment     | BASSET AUPRC | $ v _0$ | $ v _0/M$ (%) | $ v _2$ |
|------|-----------|----------------|--------------|---------|---------------|---------|
| SYDH | MCF7      | HAE2F1         | 0.423359     | 27514   | 0.28          | 2.20    |
| HAIB | K562      | SP1            | 0.422803     | 6215    | 0.06          | 1.58    |
| SYDH | K562      | JUND           | 0.420900     | 30409   | 0.30          | 5.93    |
| SYDH | HELAS3    | ZNF143         | 0.420784     | 5406    | 0.05          | 2.13    |
| HAIB | A549      | YY1C           | 0.420411     | 11293   | 0.11          | 2.20    |
| SYDH | GM12878   | POL2S2         | 0.420026     | 12996   | 0.13          | 1.84    |
| HAIB | GM12878   | POL2           | 0.419133     | 48007   | 0.48          | 3.33    |
| HAIB | PFSK1     | TAF1           | 0.415078     | 6236    | 0.06          | 1.35    |
| HAIB | K562      | PU1            | 0.411073     | 15386   | 0.15          | 4.70    |
| SYDH | GM12878   | CHD2AB68301    | 0.410210     | 16016   | 0.16          | 2.63    |
| SYDH | NB4       | CMYC           | 0.406744     | 23774   | 0.24          | 3.73    |
| HAIB | H1HESC    | TAF7SC101167   | 0.406696     | 10442   | 0.10          | 1.54    |
| SYDH | H1HESC    | CEBPB          | 0.405410     | 11800   | 0.12          | 3.73    |
| SYDH | MCF10AES  | STAT3          | 0.404351     | 33486   | 0.33          | 5.08    |
| HAIB | GM12878   | POL24H8        | 0.402366     | 31663   | 0.32          | 2.85    |
| HAIB | SKNSH     | NRSF           | 0.401931     | 7233    | 0.07          | 3.71    |
| HAIB | K562      | ZBTB7ASC34508  | 0.399912     | 19683   | 0.20          | 2.16    |
| HAIB | K562      | EGR1           | 0.399163     | 24881   | 0.25          | 3.28    |
| SYDH | MCF10AES  | STAT3          | 0.398512     | 29538   | 0.30          | 4.81    |
| SYDH | K562      | CHD2AB68301    | 0.398431     | 7834    | 0.08          | 2.01    |
| HAIB | SKNMC     | POL24H8        | 0.393543     | 21485   | 0.21          | 2.96    |
| HAIB | H1HESC    | POL24H8        | 0.391510     | 19419   | 0.19          | 1.99    |
| HAIB | K562      | CTCFLSC98982   | 0.391258     | 5891    | 0.06          | 2.85    |
| SYDH | MCF10AES  | STAT3          | 0.388008     | 31591   | 0.32          | 4.98    |
| HAIB | A549      | USF1           | 0.387810     | 6778    | 0.07          | 1.84    |
| HAIB | HEPG2     | FOXA1SC6553    | 0.386906     | 33656   | 0.34          | 5.34    |
| SYDH | MCF10AES  | STAT3          | 0.385338     | 25848   | 0.26          | 4.56    |
| HAIB | SKNSH     | NRSF           | 0.385146     | 14169   | 0.14          | 3.45    |
| SYDH | GM12891   | NFKB           | 0.383466     | 29206   | 0.29          | 4.56    |
| HAIB | H1HESC    | SP1            | 0.380258     | 12393   | 0.12          | 2.05    |
| SYDH | MCF10AES  | CMYC           | 0.379656     | 27000   | 0.27          | 4.33    |
| SYDH | HEPG2     | CEBPB          | 0.379397     | 11572   | 0.12          | 4.10    |
| HAIB | K562      | NRSF           | 0.379106     | 9598    | 0.10          | 4.30    |
| SYDH | GM12878   | USF2           | 0.377835     | 6661    | 0.07          | 2.16    |
| SYDH | HELAS3    | TBP            | 0.376722     | 17555   | 0.18          | 3.06    |
| UTA  | K562      | CMYC           | 0.372061     | 5833    | 0.06          | 1.68    |
| HAIB | K562      | ATF3           | 0.371010     | 10360   | 0.10          | 2.78    |
| SYDH | HELAS3    | MXI1AF4185     | 0.368398     | 12174   | 0.12          | 1.83    |
| HAIB | HEPG2     | FOSL2          | 0.367104     | 16407   | 0.16          | 3.44    |
| SYDH | K562      | CMYC           | 0.366773     | 21209   | 0.21          | 3.20    |
| SYDH | HELAS3    | MAFK           | 0.366364     | 9993    | 0.10          | 1.82    |
| SYDH | HELAS3    | P300SC584SC584 | 0.364830     | 18694   | 0.19          | 2.54    |
| HAIB | HEPG2     | SP1            | 0.364172     | 21711   | 0.22          | 3.58    |
| HAIB | K562      | PMLSC71910     | 0.362038     | 18655   | 0.19          | 2.75    |
| HAIB | K562      | FOSL1SC183     | 0.359258     | 6436    | 0.06          | 2.20    |
| HAIB | GM12878   | BCL11A         | 0.358333     | 12360   | 0.12          | 2.80    |
| SYDH | GM12878   | SIN3ANB6001263 | 0.356799     | 13694   | 0.14          | 1.61    |
| SYDH | K562      | CJUN           | 0.354626     | 5656    | 0.06          | 1.98    |
| SYDH | GM12878   | TBP            | 0.353883     | 15238   | 0.15          | 2.78    |
| HAIB | HEPG2     | FOXA1SC101058  | 0.353734     | 29596   | 0.30          | 4.83    |

Continued on next page

| Lab      | Cell line | Experiment     | BASSET AUPRC | $ v _0$ | $ v _0/M$ (%) | $ v _2$ |
|----------|-----------|----------------|--------------|---------|---------------|---------|
| HAIB     | HEPG2     | CEBPBSC150     | 0.348724     | 9795    | 0.10          | 3.67    |
| HAIB     | A549      | NRSF           | 0.348252     | 12999   | 0.13          | 3.65    |
| HAIB     | GM12878   | BATF           | 0.347600     | 18755   | 0.19          | 3.78    |
| HAIB     | A549      | USF1           | 0.347257     | 8140    | 0.08          | 2.22    |
| BROAD    | H1HESC    | RBBP5A300109A  | 0.343881     | 25833   | 0.26          | 1.35    |
| HAIB     | GM12892   | PAX5C20        | 0.343844     | 8182    | 0.08          | 1.34    |
| BROAD    | K562      | POL2B          | 0.341811     | 15495   | 0.15          | 1.86    |
| HAIB     | GM12878   | NFICSC81335    | 0.341187     | 33737   | 0.34          | 3.76    |
| SYDH     | HELAS3    | RFX5200401194  | 0.341053     | 15994   | 0.16          | 2.36    |
| HAIB     | GM12878   | IRF4SC6059     | 0.340861     | 14517   | 0.15          | 2.83    |
| HAIB     | GM12878   | POU2F2         | 0.336826     | 18566   | 0.19          | 2.97    |
| HAIB     | HEPG2     | FOXA2SC6554    | 0.336085     | 27428   | 0.27          | 4.48    |
| HAIB     | SKNSH     | SIN3AK20       | 0.336066     | 13855   | 0.14          | 1.95    |
| HAIB     | GM12878   | ATF2SC81188    | 0.335843     | 26054   | 0.26          | 3.55    |
| SYDH     | HELAS3    | USF2           | 0.329562     | 8429    | 0.08          | 1.85    |
| SYDH     | HELAS3    | E2F1           | 0.328842     | 5081    | 0.05          | 0.74    |
| SYDH     | MCF10AES  | CMYC           | 0.327448     | 19677   | 0.20          | 2.88    |
| HAIB     | HEPG2     | HNF4ASC8987    | 0.325563     | 13192   | 0.13          | 3.15    |
| SYDH     | K562      | UBTFSAB1404509 | 0.325086     | 14930   | 0.15          | 1.59    |
| UCHICAGO | K562      | EJUND          | 0.323401     | 26489   | 0.26          | 3.49    |
| UTA      | GM12878   | CMYC           | 0.322020     | 5627    | 0.06          | 0.63    |
| BROAD    | K562      | SAP3039731     | 0.320382     | 11693   | 0.12          | 1.16    |
| SYDH     | K562      | CMYC           | 0.318111     | 11312   | 0.11          | 2.06    |
| HAIB     | H1HESC    | EGR1           | 0.317297     | 7071    | 0.07          | 0.68    |
| HAIB     | K562      | CEBPBSC150     | 0.311232     | 18052   | 0.18          | 3.71    |
| HAIB     | H1HESC    | SIN3AK20       | 0.310984     | 7354    | 0.07          | 1.48    |
| SYDH     | GM15510   | NFKB           | 0.309530     | 13887   | 0.14          | 2.14    |
| BROAD    | K562      | HDAC1SC6298    | 0.308889     | 15009   | 0.15          | 1.08    |
| SYDH     | GM19099   | NFKB           | 0.308646     | 6705    | 0.07          | 1.71    |
| HAIB     | GM12878   | FOXM1SC502     | 0.307947     | 26561   | 0.27          | 2.91    |
| HAIB     | PANC1     | POL24H8        | 0.306956     | 11954   | 0.12          | 1.43    |
| HAIB     | HEPG2     | HNF4GSC6558    | 0.305644     | 14815   | 0.15          | 2.92    |
| HAIB     | HEPG2     | JUND           | 0.305335     | 14409   | 0.14          | 2.61    |
| SYDH     | K562      | TAL1SC12984    | 0.304212     | 18090   | 0.18          | 4.50    |
| HAIB     | HEPG2     | CEBPDSC636     | 0.303716     | 8698    | 0.09          | 1.82    |
| SYDH     | K562      | CORESTSC30189  | 0.303011     | 28293   | 0.28          | 3.98    |
| SYDH     | K562      | BHLHE40NB100   | 0.301552     | 19955   | 0.20          | 2.77    |
| HAIB     | GM12878   | EBF1SC137065   | 0.301285     | 24230   | 0.24          | 3.43    |

---

See Excel file

---

**Table S2: Numerical results for Figure 1.** We list all P-values used for the simulations of a) no enrichment, b) unsigned enrichment, and c) directional effects of minor alleles, with and without the 5-MAF-bin signed background model.

---

See Excel file

---

**Table S3: Numerical results for Figure 2.** We list a) estimated power, with standard errors, for both methods analyzed in Figure 2a, b) mean estimate of  $r_f$ , with standard error, for all values of  $r_f$  simulated, together with quantiles of the sampling distribution of our estimator.

---

See Excel file

---

**Table S4: List of traits analyzed in BLUEPRINT/NTR analysis.** We list the set of traits analyzed in the BLUEPRINT/NTR analysis, with number of typed SNPs for each trait.

---

See Excel file

---

**Table S5: Details of results of BLUEPRINT/NTR analysis.** We list a) the set of 409 significant associations at per-trait FDR < 5% for the BLUEPRINT gene expression analysis, with laboratory, cell line, and TF listed for each significant annotation, along with estimated  $r_f$ , P-value, and whether the TF is known to be activating; b) the set of 18 significant associations at per-trait FDR < 5% for the NTR gene expression analysis; c) the side-by-side comparison of z-scores from the BLUEPRINT neutrophil expression analysis and the NTR analysis; d) the set of 286 significant associations at per-trait FDR < 5% for the BLUEPRINT H3K4me1 analysis; and e) the set of 359 significant associations at per-trait FDR < 5% for the BLUEPRINT H3K27ac analysis. Note that because the QTL summary statistics analyzed here are processed in a way that places different SNPs on different scales, the relative values of  $r_f$  in these results are interpretable but the absolute magnitudes are not.

---

See Excel file

---

**Table S6: List of GTEx traits analyzed.** We list the set of GTEx traits analyzed, with number of typed SNPs and average sample size for each trait.

---

See Excel file

---

**Table S7: Results of GTEx analysis.** We list a) the set of 2,330 significant associations at per-trait FDR < 5% for the GTEx gene expression analysis, with laboratory, cell line, and TF listed for each significant annotation, along with estimated  $r_f$  and P-value; and b) the same information for the subset of results whose significance did not decrease in the conditional analysis. Note that because the QTL summary statistics analyzed here are processed in a way that places different SNPs on different scales, the relative values of  $r_f$  in these results are interpretable but the absolute magnitudes are not.

---

See Excel file

---

**Table S8: List of diseases and complex traits analyzed.** We list the set of diseases and complex traits analyzed, with sample size, number of typed SNPs, and estimated SNP-heritability for each trait.

---

See Excel file

---

**Table S9: Results of SLDP analysis of 46 diseases and complex traits.** We list a) the set of 77 significant associations at per-trait FDR < 5% for the TF annotations, with laboratory, cell line, and transcription factor listed for each significant annotation, along with estimated  $r_f$  and P-value; b) the set of 4 significant associations at per-trait FDR < 5% for the alternate set of 382 annotations defined using the same set of SNPs with non-zero effects but with the directionality of effect determined by minor allele coding rather than predicted TF binding, for SNPs in the bottom quintile of the MAF spectrum; c) quantification of unsigned heritability explained by signed enrichments reported in (a). Specifically: because  $r_f^2$  for an annotation can never exceed the total proportion of heritability explained by the SNPs with nonzero values of the annotation, we computed for each association the ratio of estimated  $r_f^2$  to the proportion of SNPs with nonzero values of the annotation. We found that in some cases the signed signal was not only non-trivially different from zero but also substantial enough to imply an unsigned enrichment.

---

See Excel file

---

**Table S10: Results of enrichment analysis of signed LD profile regression disease/complex trait results.** We list significant gene-set enrichments for the 77 significant signed LD profile regression associations to diseases and complex traits. For (a) each of the top significant enrichments listed in Table 1 and (b) all of the significant enrichments at per-stratum FDR < 5%, we list: details of the annotation and phenotype underlying the signed LD profile regression result, the full name of the enriched gene set, the enrichment, the average signed LD profile covariance among LD blocks containing genes in the set (with standard error), the average signed LD profile covariance among LD block not containing genes in the set (with standard error), a p-value generated by permuting LD blocks, and a q-value calculated among the tests conducted for each signed LD profile result within each MSigDB database.

---

See Excel file

---

**Table S11: Numerical results for Figure 6.** For each result in the figure, we list i) the numerical values used to make the plot of  $\hat{\alpha}$  against  $Rv$ , and ii) the association summary statistics used to make the Manhattan plot, and iii) the numerical results underlying the two displayed gene-set enrichments.

---

See Excel file

---

**Table S12: Numerical results for Figure 7.** For each result in the figure, we list i) the numerical values used to make the plot of  $\hat{\alpha}$  against  $Rv$ , and ii) the association summary statistics used to make the Manhattan plot, and iii) the numerical results underlying the two displayed gene-set enrichments.

| SNP        | P(in causal set) | Causal post. prob. | Z       |
|------------|------------------|--------------------|---------|
| rs10189857 | 0.25             | 1                  | 8.0933  |
| rs356991   | 0.128176         | 0.512705           | 6.03    |
| rs168565   | 0.0366951        | 0.14678            | 5.9928  |
| rs6545816  | 0.154972         | 0.619888           | 5.4231  |
| rs6545817  | 0.0950247        | 0.380099           | 5.3862  |
| rs243071   | 0.25             | 1                  | -5.2992 |

**Table S13: Fine mapping of EDU signal at *BCL11A* locus.** We list the six SNPs in the 95% credible set when running the CAVIAR method with the parameter  $c = 4$ . rs10189857 is an intronic SNP in the *BCL11A* gene. (Results with  $c = 2$  and  $c = 3$  were similar.)



| Cistrome ID | cell type/line           | position on chr12 (kb) | TSS | body | reference                      |
|-------------|--------------------------|------------------------|-----|------|--------------------------------|
| 63463       | K562 (myeloid)           | 67561.047-67561.370    | *   |      | Davis et al. <sup>25</sup>     |
| 63463       | K562 (myeloid)           | 67644.456-67644.877    |     |      | Davis et al. <sup>25</sup>     |
| 64734       | GM12878 (LCL)            | 67566.529-67566.998    |     | *    | Davis et al. <sup>25</sup>     |
| 64734       | GM12878 (LCL)            | 67644.381-67644.827    |     |      | Davis et al. <sup>25</sup>     |
| 64919       | K562 (myeloid)           | 67561.765-67562.191    | *   |      | Davis et al. <sup>25</sup>     |
| 64919       | K562 (myeloid)           | 67601.114-67601.351    |     | *    | Davis et al. <sup>25</sup>     |
| 64919       | K562 (myeloid)           | 67644.587-67644.893    |     |      | Davis et al. <sup>25</sup>     |
| 64735       | GM12878 (LCL)            | 67561.943-67562.241    | *   |      | Davis et al. <sup>25</sup>     |
| 64735       | GM12878 (LCL)            | 67566.547-67567.093    |     | *    | Davis et al. <sup>25</sup>     |
| 64735       | GM12878 (LCL)            | 67644.406-67644.874    |     |      | Davis et al. <sup>25</sup>     |
| 73238       | B cell precursor         | 67562.052-67562.249    | *   |      | Schjerven et al. <sup>26</sup> |
| 57640       | Nalm6 (B cell precursor) | 67552.499-67552.751    |     |      | Song et al. <sup>27</sup>      |

**Table S14:** IKZF1 ChIP-seq peaks within 10kb of the *CTCF* gene body (chr16:67562.406kb-67639.185kb) in publicly available ChIP-seq data processed by the cistrome database. Peaks located within 2kb of the *CTCF* TSS and located within the *CTCF* gene body are indicated. Raw data were found using the Cistrome data browser.<sup>28</sup>

| Cistrome ID | cell type/line       | position on chr12 (kb) | TSS | body | reference                        |
|-------------|----------------------|------------------------|-----|------|----------------------------------|
| 35517       | OCI-Ly1 (B lymph)    | 67552.542-67552.694    |     |      | Hatzi et al. <sup>29</sup>       |
| 35517       | OCI-Ly1 (B lymph)    | 67561.828-67561.989    | *   |      | Hatzi et al. <sup>29</sup>       |
| 35517       | OCI-Ly1 (B lymph)    | 67562.145-67562.414    | *   | *    | Hatzi et al. <sup>29</sup>       |
| 35517       | OCI-Ly1 (B lymph)    | 67563.131-67563.598    | *   | *    | Hatzi et al. <sup>29</sup>       |
| 35517       | OCI-Ly1 (B lymph)    | 67644.691-67644.898    |     |      | Hatzi et al. <sup>29</sup>       |
| 35517       | OCI-Ly1 (B lymph)    | 67645.077-67645.307    |     |      | Hatzi et al. <sup>29</sup>       |
| 52774       | T lymphocyte         | 67562.240-67562.531    | *   | *    | Hatzi et al. <sup>29</sup>       |
| 52774       | T lymphocyte         | 67562.729-67562.889    | *   | *    | Hatzi et al. <sup>29</sup>       |
| 52303       | T lymphocyte         | 67561.830-67561.976    | *   |      | Hatzi et al. <sup>29</sup>       |
| 52303       | T lymphocyte         | 67562.145-67562.304    | *   |      | Hatzi et al. <sup>29</sup>       |
| 52303       | T lymphocyte         | 67563.760-67563.957    | *   | *    | Hatzi et al. <sup>29</sup>       |
| 35085       | B lymphocyte         | 67554.235-67554.385    |     |      | Huang et al. <sup>30</sup>       |
| 35085       | B lymphocyte         | 67562.163-67562.501    | *   | *    | Huang et al. <sup>30</sup>       |
| 35085       | B lymphocyte         | 67563.134-67563.543    | *   | *    | Huang et al. <sup>30</sup>       |
| 35085       | B lymphocyte         | 67563.826-67564.064    | *   | *    | Huang et al. <sup>30</sup>       |
| 35085       | B lymphocyte         | 67644.751-67645.243    |     |      | Huang et al. <sup>30</sup>       |
| 1958        | B JURL-MK1 (myeloid) | 67561.844-67562.437    | *   | *    | Hurtz et al. <sup>31</sup>       |
| 1958        | B JURL-MK1 (myeloid) | 67562.740-67562.886    | *   | *    | Hurtz et al. <sup>31</sup>       |
| 1958        | B JURL-MK1 (myeloid) | 67563.293-67563.487    | *   | *    | Hurtz et al. <sup>31</sup>       |
| 1958        | B JURL-MK1 (myeloid) | 67644.723-67644.898    |     |      | Hurtz et al. <sup>31</sup>       |
| 39572       | B OCI-Ly1 (B lymph)  | 67562.242-67562.397    | *   |      | Swaminathan et al. <sup>32</sup> |
| 39572       | B OCI-Ly1 (B lymph)  | 67563.257-67563.556    | *   | *    | Swaminathan et al. <sup>32</sup> |

**Table S15:** BCL6 ChIP-seq peaks within 10kb of the *CTCF* gene body in publicly available ChIP-seq data processed by the cistrome database. Peaks located within 2kb of the *CTCF* TSS and located within the *CTCF* gene body are indicated. Raw data were found using the Cistrome data browser.<sup>28</sup>

---

See Excel file

---

**Table S16: Results of signed LD profile regression using DeepSEA-based annotations.** We list significant results at per-trait FDR < 5% for (a) the BLUEPRINT blood molecular traits, (b) the NTR whole blood eQTLs, (c) the GTEx tissue eQTLs, and (d) the diseases and complex traits analyzed. For each significant annotation, we list TF name, laboratory, and cell line, along with estimated  $r_f$  and P-value. The number of significant results identified by these 382 annotations was BLUEPRINT: 810; NTR: 0; GTEx: 1298; complex traits: 7.

---

See Excel file

---

**Table S17: Results of signed LD profile regression using GTRD-based annotations.** We list significant results at per-trait FDR < 5% for (a) the BLUEPRINT blood molecular traits, (b) the NTR whole blood eQTLs, (c) the GTEx tissue eQTLs, and (d) the diseases and complex traits analyzed. For each significant annotation, we list the GTRD TF name, along with estimated  $r_f$  and P-value. The number of significant results identified by these 149 annotations was BLUEPRINT: 313; NTR: 27; GTEx: 242; complex traits: 7.

---

See Excel file

---

**Table S18: Results of signed LD profile regression using HOCOMOCO motif-based annotations.** We downloaded the 402 core human mononucleotide TF binding motifs from the HOCOMOCO database. For each of our ENCODE ChIP-seq tracks whose TF we could match to a HOCOMOCO TF motif, we then created an annotation using the HOCOMOCO motif to score SNPs inside the ChIP-seq peaks in that track. This resulted in 276 annotations. We scored each SNP allele as follows: for each allele  $x$  of the SNP, we placed the allele in the context of the reference genome, computed a PWM score  $s_i(x)$  of the resulting sequence for all possible placements  $i$  of the PWM that overlapped the SNP, scored the allele  $x$  using  $t(x) = \sum_i \exp s_i(x)$ , and then used  $t(a) - t(A)$  to score the SNP, where  $a$  and  $A$  are the two alleles of the SNP. We list significant results at per-trait FDR < 5% for (a) the BLUEPRINT blood molecular traits, (b) the NTR whole blood eQTLs, (c) the GTEx tissue eQTLs, and (d) the diseases and complex traits analyzed. For each significant annotation, we list the TF name together with the laboratory and cell line of the ENCODE ChIP-seq track used to determine which SNPs to include in the annotation, along with estimated  $r_f$  and P-value. The number of significant results identified by these 276 annotations was BLUEPRINT: 9; NTR: 0; GTEx: 298; complex traits: 103.

| Source (# annotations) | Blood QTL | GTEEx | Diseases/complex traits | Total (per annotation) |
|------------------------|-----------|-------|-------------------------|------------------------|
| Basset (382)           | 1072      | 2330  | 77                      | 3479 (9.1)             |
| DeepSEA (382)          | 810       | 1298  | 7                       | 2115 (5.5)             |
| GTRD (184)             | 350       | 242   | 7                       | 589 (3.2)              |
| HOCOMOCO (276)         | 9         | 298   | 103                     | 410 (1.5)              |

**Table S19:** For each source of annotations, we report the number of associations at per-trait FDR < 5% obtained upon analysis of: the blood molecular QTL data, the GTEEx eQTL data, the disease/complex trait data, and all traits combined. To facilitate comparison across differently sized sets of annotations, we additionally report the total number of results per annotation for each source of annotations.

| Trait        | TF (num)   | $r_f$ | $p$                  | $q$                  |
|--------------|------------|-------|----------------------|----------------------|
| Years of ed. | BCL11A (1) | 2.4%  | $3.9 \times 10^{-5}$ | $1.5 \times 10^{-2}$ |
| Crohn's      | POL2 (16)  | 5.3%  | $4.8 \times 10^{-5}$ | $1.5 \times 10^{-2}$ |
| Anorexia     | SP1 (1)    | -8.9% | $1.1 \times 10^{-4}$ | $4.0 \times 10^{-2}$ |
| HDL          | FOS (1)    | 4.8%  | $1.2 \times 10^{-4}$ | $4.6 \times 10^{-2}$ |
| Eczema       | CTCF (12)  | 2.7%  | $1.4 \times 10^{-4}$ | $3.4 \times 10^{-2}$ |
| Crohn's      | ELF1 (1)   | 4.9%  | $1.6 \times 10^{-4}$ | $1.5 \times 10^{-2}$ |
| Lupus        | CTCF (35)  | -5.0% | $3.6 \times 10^{-4}$ | $4.4 \times 10^{-2}$ |
| Crohn's      | TBP (2)    | 5.4%  | $4.9 \times 10^{-4}$ | $1.5 \times 10^{-2}$ |
| Crohn's      | E2F1 (1)   | 4.3%  | $6.4 \times 10^{-4}$ | $2.7 \times 10^{-2}$ |
| Crohn's      | TAF1 (4)   | 4.5%  | $9.2 \times 10^{-4}$ | $2.5 \times 10^{-2}$ |
| Crohn's      | IRF1 (1)   | 4.7%  | $9.8 \times 10^{-4}$ | $1.5 \times 10^{-2}$ |
| Crohn's      | ETS1 (1)   | 6.1%  | $1.4 \times 10^{-3}$ | $1.5 \times 10^{-2}$ |
| Lupus        | RAD21 (1)  | -3.9% | $4.4 \times 10^{-3}$ | $4.1 \times 10^{-2}$ |

**Table S20: Distinct TF-trait associations from analysis of diseases and complex traits using signed LD profile regression.** For each of 13 distinct TF-trait associations at per-trait FDR < 5%, we report the associated trait, the associated TF and the total number of annotations for that TF that produced a significant result, the estimate of the functional correlation  $r_f$ , and the P-value for the most significant annotation.

## Supplementary Figures

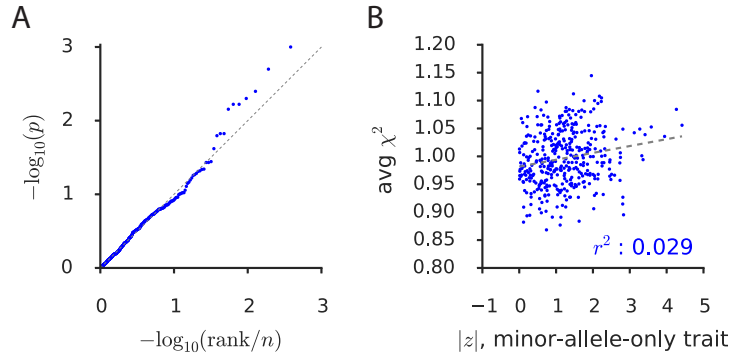

**Figure S1: Per-annotation analyses of null calibration.** (a) For each annotation, we used the Simes test<sup>33</sup> to assess the p-value threshold at which the Benjamini-Hochberg procedure would lead to any rejections among 1000 simulated phenotypes with no unsigned enrichment or functional correlation, and we visualized the resulting set of 382 p-values using a q-q plot. These p-values appear uniformly distributed, as would be expected in the scenario of proper calibration. (b) For each annotation, we plot the average  $\chi^2$  statistic for that annotation across the 1000 null simulations containing confounding due to genome-wide directional effects of minor alleles on disease risk, against the magnitude of that annotation’s z-score for correlation with a 100%-heritable trait whose causal SNPs are exactly the bottom fifth of the MAF spectrum with minor alleles always being trait-increasing. (Statistical significance of the trend is difficult to assess because many annotations are correlated, inducing a complex dependence structure among the 382 points on the plot.)

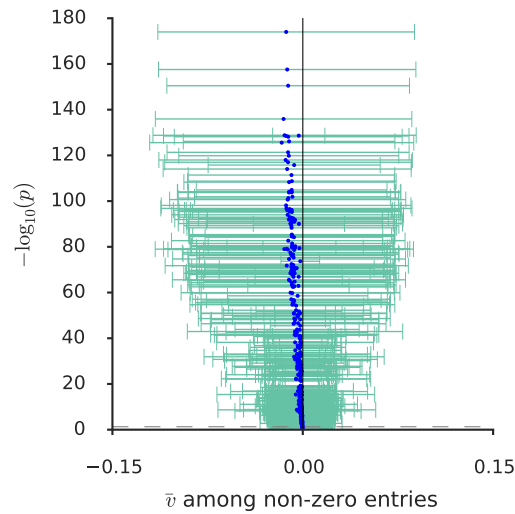

**Figure S2: Relationship of annotations to minor alleles.** For each annotation, we computed the mean and standard deviation of the predicted effect of the minor allele among all SNPs with non-zero values of the annotation. We then performed a chi-squared test for the mean being non-zero and plotted  $-\log_{10}(p)$  against the mean for each annotation. The green intervals show the standard deviation, in order to give a sense for the scale on which to interpret the mean-shift. The dotted gray line indicates the threshold for FDR significance. 373 of the 382 annotations exceeded this threshold.

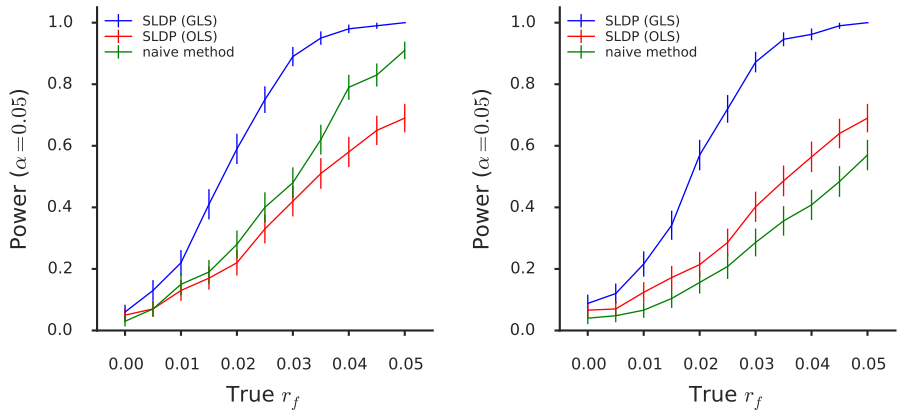

**Figure S3: Power comparison of signed LD profile regression to additional methods.** Power curves comparing signed LD profile regression using generalized least-squares (GLS; i.e., weighting) to both ordinary (i.e., unweighted) regression of the GWAS summary statistics on the signed LD profile as well as to a naive method that simply regresses the GWAS summary statistics on the raw annotation. (Left) power comparison with 19.5% of causal SNPs typed, (Right) power comparison with only 9.75% of causal SNPs typed. The real phenotypes analyzed all have at most 11.9% of causal SNPs typed. SLDP regression with default weights is the most powerful method in both regimes. Additionally, the power of the naive method suffers when fewer SNPs are typed, while the power of SLDP regression is far less sensitive to this change.

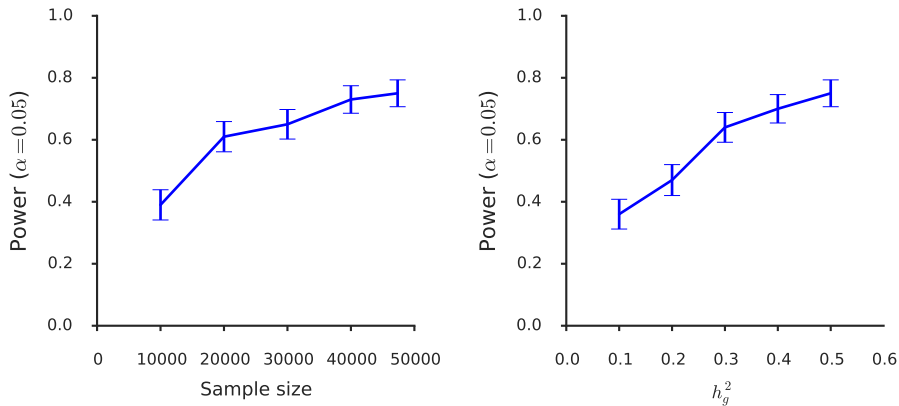

**Figure S4: Effect of sample size and heritability on power.** Power of signed LD profile regression as a function of (left) sample size, and (right) overall trait heritability, when proportion of heritability explained by the signed effect is held constant. Error bars indicate standard errors of power estimates.

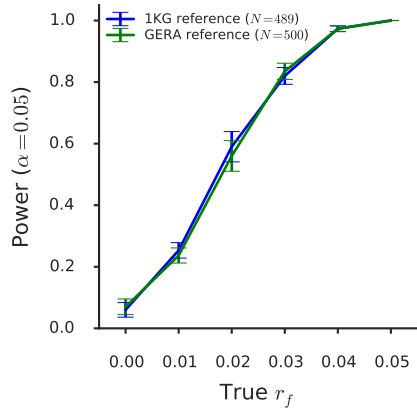

**Figure S5: Effect of reference panel on power.** Power of signed LD profile regression as a function of effect size as measured by  $r_f$ , with either a 1000G reference panel or a randomly chosen in-sample reference panel of comparable size. Error bars indicate standard errors of power estimates.

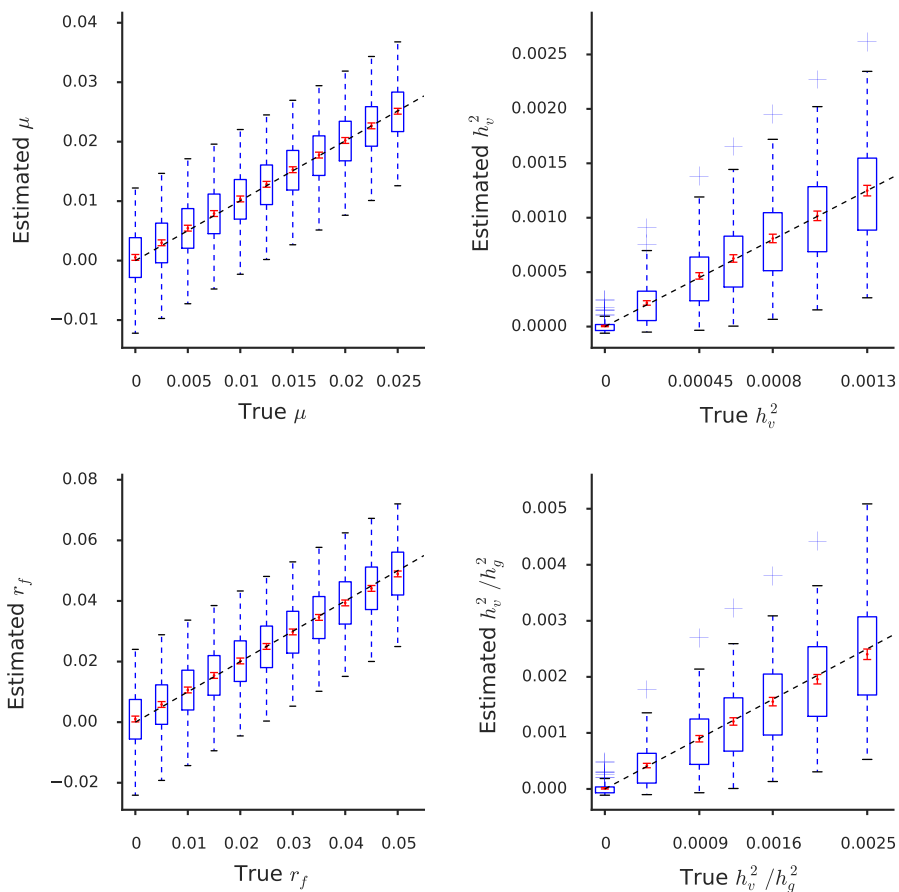

**Figure S6: Bias in estimation of additional estimands.** Assessments of the bias of signed LD profile regression with an out-of-sample reference panel in estimating  $\mu$ ,  $h_v^2$ ,  $r_f$ , and  $h_v^2/h_g^2$ . For definitions of these quantities, see Supplementary Note.

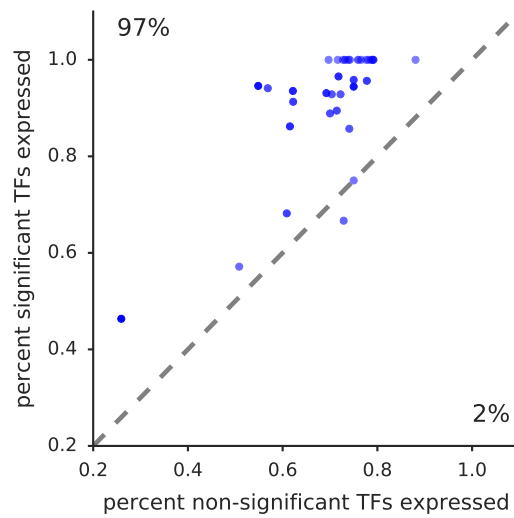

**Figure S7: Comparison across tissues of expression levels of TFs identified by signed LD profile regression in each tissue to expression levels of TFs not identified.** For each GTEx tissue in which we found significant TF expression associations, we plot the fraction of significant TFs that are expressed (TPM>5, following Weintraub *et al.*<sup>34</sup>) against the fraction of non-significant TFs that are expressed. Points are colored in proportion to the number of significant results in each tissue.

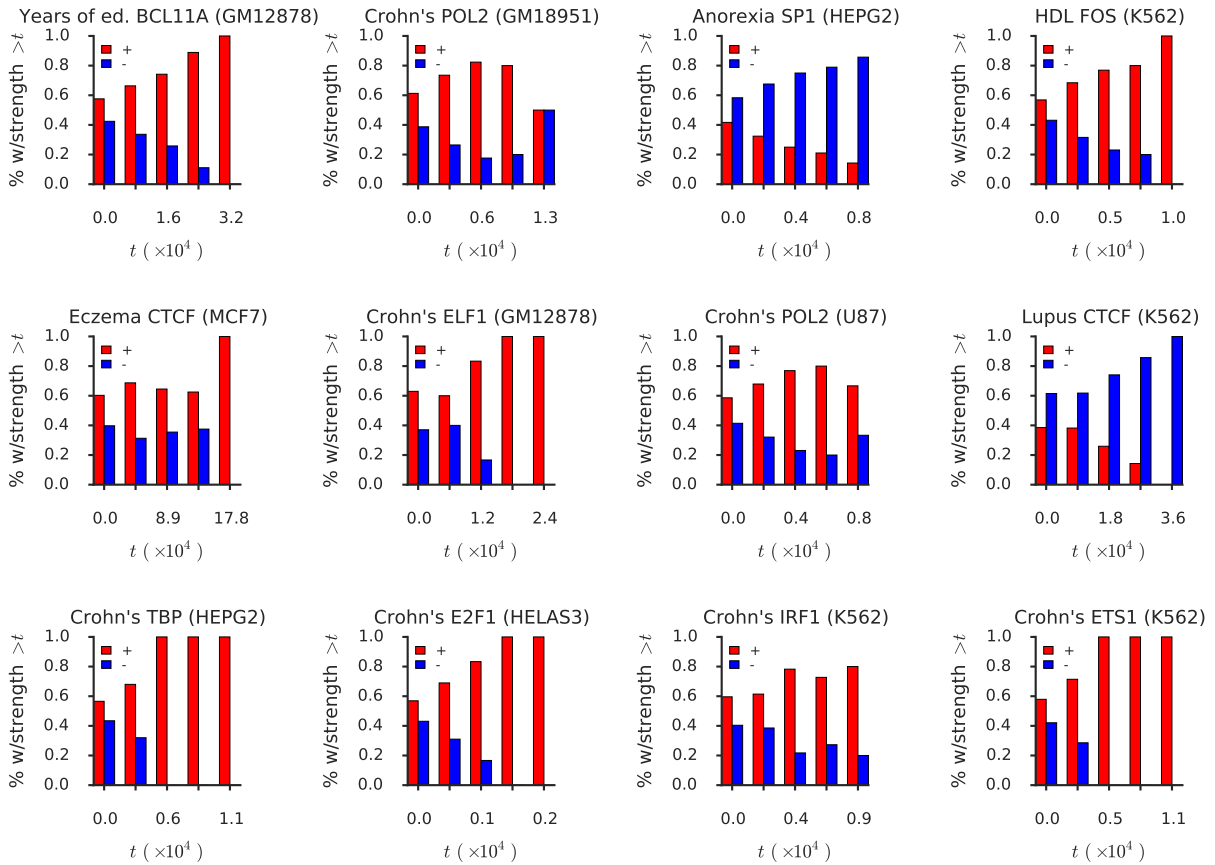

**Figure S8: Distribution of covariance between GWAS summary statistics and signed LD profile.** For each of our twelve independent results, we plot, for a variety of thresholds  $t$ , the fraction of the approximately 300 independent genomic blocks with  $|\text{cov}(\hat{\alpha}, Rv)| > t$  in which the covariance is positive versus negative. There is an excess of blocks in which sign of the covariance matches the genome-wide direction of effect. (We note that, as this figure illustrates, our results do not imply that the sign of the covariance matches the genome-wide direction of effect in *all* blocks.)



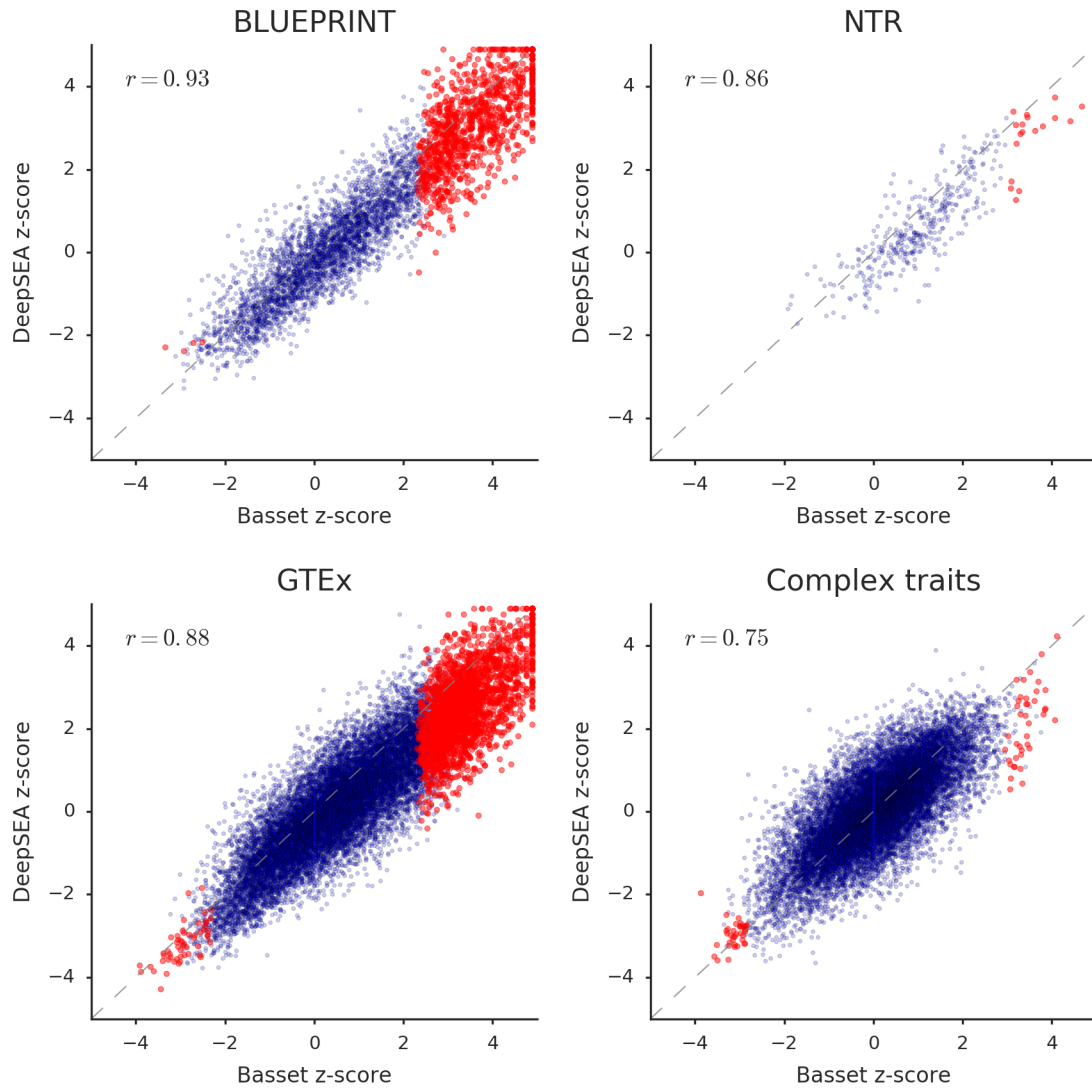

**Figure S9: Comparison of signed LD profile regression using Basset to results using DeepSEA.**

For each phenotype and each of the 382 ENCODE ChIP-seq tracks used in our main analyses, we plot the SLDP z-score of the DeepSEA-derived annotation from that track on that phenotype against SLDP z-scores of the Basset-derived annotation from that same track on that same phenotype. We display separate plots for the four sets of phenotypes analyzed in the paper; red dots indicate significant results from our main analyses using the Basset-derived annotations; correlations between the two sets of z-scores are indicated on each plot.

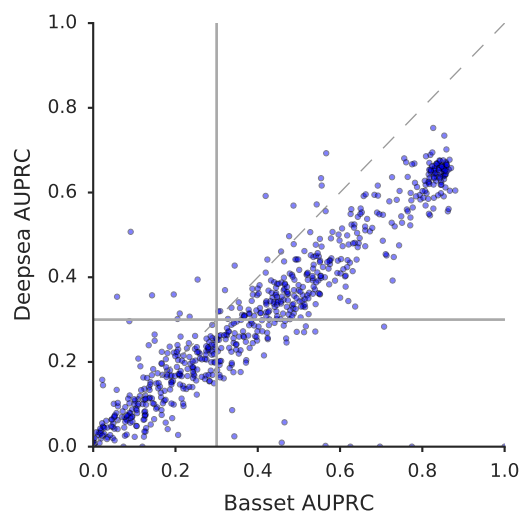

**Figure S10: Comparison of Deepsea prediction accuracy to Basset prediction accuracy.** For each of the 691 ENCODE TF ChIP-seq tracks for which we had AUPRC information using both Basset and DeepSEA, we plot the DeepSEA AUPRC for that track against the Basset AUPRC for that track. The dashed line indicates  $y = x$ , and the solid lines indicate our QC threshold of  $\text{AUPRC} > 0.3$ .

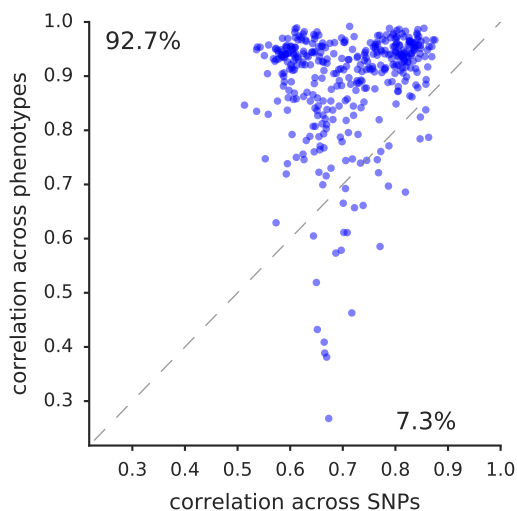

**Figure S11: Basset and Deepsea converge on biological signal.** For each of the 382 ENCODE ChIP-seq tracks used in our main analyses, we plot (i) the correlation *across SNPs* between the Basset-derived annotation for that track and the DeepSEA-derived annotation for that track, against (ii) the correlation *across phenotypes* between the z-scores of the Basset-derived annotation for that track and the z-scores of the DeepSEA-derived annotation for that track. The dashed line indicates  $y = x$ , and the percentages indicate the fraction of annotations in which either (i)  $>$  (ii) or (i)  $<$  (ii). The fact that the vast majority of annotations are more correlated when the correlation is measured across phenotypes indicates that the signal that is shared between Basset and DeepSEA is strongly reflected in GWAS data.

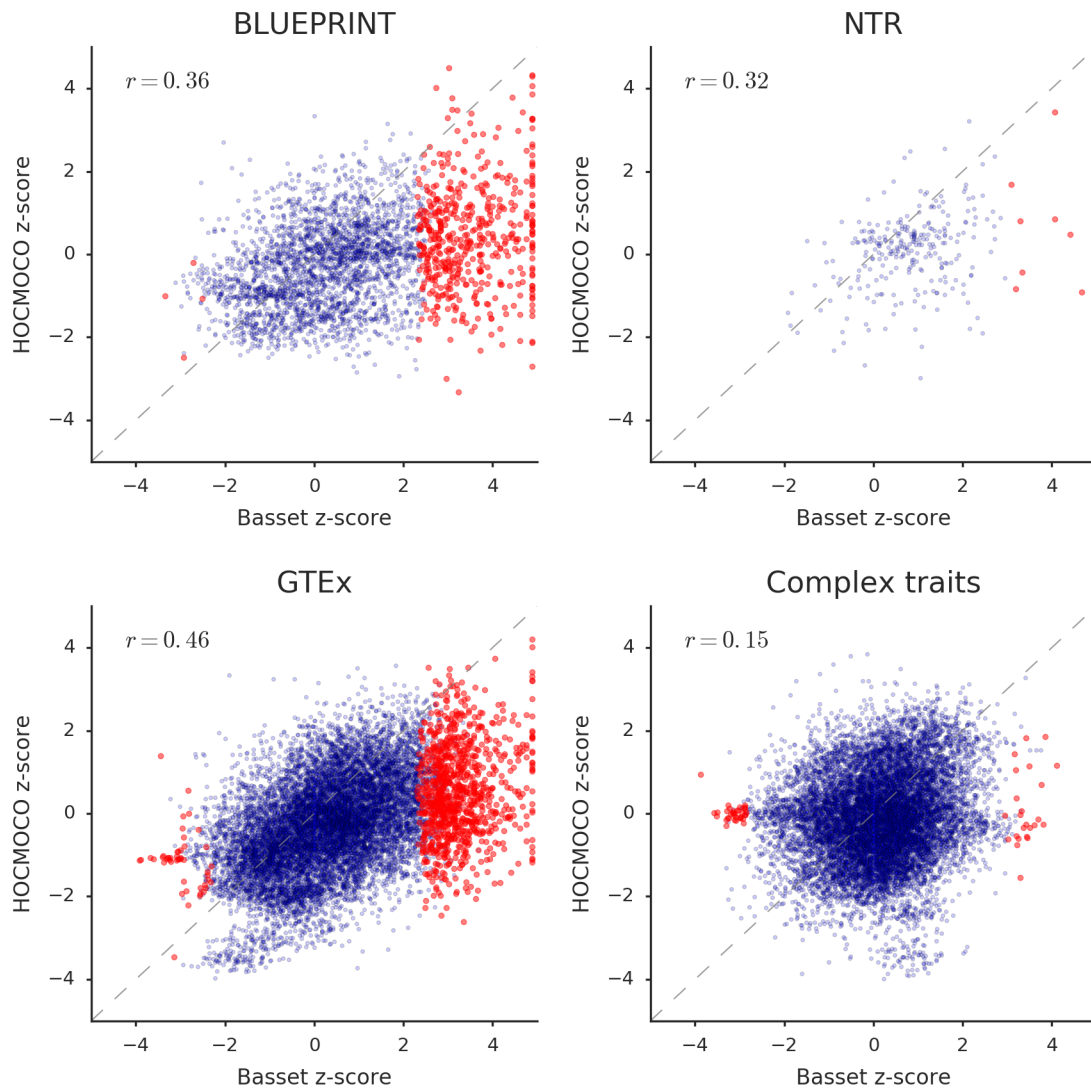

**Figure S12: Comparison of signed LD profile regression using Basset to results using motifs from HOCOMOCO database.** For each phenotype and each of the 276 ENCODE ChIP-seq tracks used in our main analyses that had a corresponding motif in HOCOMOCO, we plot the SLDP z-score of the HOCOMOCO-derived annotation from that track on that phenotype against SLDP z-scores of the Basset-derived annotation from that same track on that same phenotype. We display separate plots for the four sets of phenotypes analyzed in the paper; red dots indicate significant results from our main analyses using the Basset-derived annotations; correlations between the two sets of z-scores are indicated on each plot.

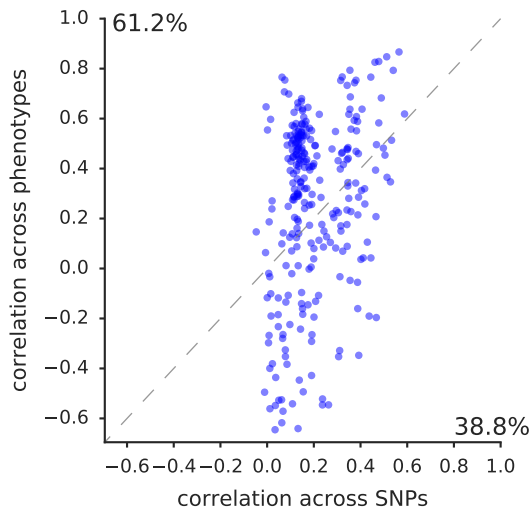

**Figure S13: Basset and HOCOMOCO motifs converge weakly on biological signal.** For each of the 276 ENCODE ChIP-seq tracks used in our main analyses that had a corresponding motif in HOCOMOCO, we plot (i) the correlation *across SNPs* between the Basset-derived annotation for that track and the HOCOMOCO-derived annotation for that track, against (ii) the correlation *across phenotypes* between the z-scores of the Basset-derived annotation for that track and the z-scores of the HOCOMOCO-derived annotation for that track. The dashed line indicates  $y = x$ , and the percentages indicate the fraction of annotations in which either (i) > (ii) or (i) < (ii). The majority of annotations are more correlated when the correlation is measured across phenotypes, indicating that the signal that is shared between Basset and HOCOMOCO is reflected in GWAS data. However, the trend is considerably weaker than it is when Basset and DeepSEA are compared (see Figure S11).

## Appendix: the distribution of GWAS summary statistics

We define the vector  $\hat{\alpha}$  of marginal correlations between SNPs and trait and derive its first two moments under a variety of relevant models, building up to the signed LD profile regression model.

### Definitions

Let  $M$  be the number of SNPs in the genome. Assume we have sampled  $N$  genotype vectors  $x_1, \dots, x_N$  i.i.d. from some population distribution, and that the phenotypes  $y_1, \dots, y_N$  of those individuals satisfy

$$y_n = x_n^T \beta + \varepsilon_n \quad (18)$$

where  $\beta \in \mathbb{R}^M$  is the vector of true causal SNP effects on trait, and  $\varepsilon_n \stackrel{iid}{\sim} \mathcal{N}(0, \sigma_e^2)$  are independent of the  $x_n$ . We assume throughout this section that genotypes are standardized in the population, i.e.,  $E(x_{nm}) = 0$  and  $E(x_{nm}^2) = 1$  for all  $n, m$ . We assume the same of the phenotype:  $E(y_n) = 0$  and  $E(y_n^2) = 1$  for all  $n$ . These assumptions are for expositional convenience.

Let  $X \in \mathbb{R}^{N \times M}$  be the matrix whose  $n$ -th row is  $x_n^T$ , and let  $Y \in \mathbb{R}^N$  be the vector whose  $n$ -th entry is  $y_n$ . The vector

$$\hat{\alpha} = \frac{X^T Y}{N}, \quad (19)$$

which has as its  $m$ -th entry the in-sample marginal correlation between SNP  $m$  and the trait, is the vector of *GWAS summary statistics*.

Having defined  $\hat{\alpha}$ , we now proceed to derive its first two moments, initially for fixed  $X$  and fixed  $\beta$ , and then for fixed  $\beta$  only. After doing so, we will impose the distributional assumption on  $\beta$  used in signed LD profile regression and, by marginalizing out  $\beta$  according to this distribution, we will obtain the result required for this paper.

### Derivation for fixed $X$ and fixed $\beta$

When both  $X$  and  $\beta$  are fixed, the following proposition<sup>35</sup> gives the moments of  $\hat{\alpha}$ .

**Proposition 1.** *Under the model defined above,  $\hat{\alpha}$  satisfies*

$$\hat{\alpha} | X, \beta \sim \mathcal{N} \left( \hat{R} \beta, \sigma_e^2 \frac{\hat{R}}{N} \right) \quad (20)$$

where  $\hat{R} = X^T X / N$  is the sample covariance matrix of the genotypes.

*Proof.* Let  $\varepsilon \in \mathbb{R}^N$  be the vector whose  $n$ -th entry is  $\varepsilon_n$ . When  $X$  and  $\beta$  are both fixed, it is easy to see that

$$\hat{\alpha} = \frac{1}{N} X^T Y \quad (21)$$

$$= \frac{1}{N} X^T (X^T \beta + \varepsilon) \quad (22)$$

$$= \hat{R} \beta + \frac{1}{N} X^T \varepsilon. \quad (23)$$

The result follows from normality of  $\varepsilon$ , together with  $E(\varepsilon) = 0$ , and  $\text{var}(X^T \varepsilon / N) = \sigma_e^2 X^T X / N^2 = \sigma_e^2 \hat{R} / N$ .  $\square$

### Derivation for random $X$ and fixed $\beta$

When working with summary statistics, it is desirable to explicitly model the relationship between the unobserved individuals and the LD reference panel by assuming the individuals were drawn from a population distribution whose LD properties we are given by the reference panel. The following result states the moments of  $\hat{\alpha}$  when we do so. We prove the result assuming Gaussian genotypes, but it can be shown to be robust to this assumption provided there is a lower bound on minor allele frequency relative to sample size.

**Proposition 2.** *Under the model defined above and assuming Gaussian genotypes,  $\hat{\alpha}$  satisfies*

$$\hat{\alpha}|\beta \sim \left[ R\beta, \frac{1}{N} (R + R\beta\beta^T R) \right] \quad (24)$$

where  $R = \text{cov}(x_n) \in \mathbb{R}^{M \times M}$  is the population covariance matrix of the genotypes, and the notation  $[\cdot, \cdot]$  is used to specify the mean and covariance of the distribution without specifying any higher moments.

*Proof.* Application of the law of total expectation to the result from Proposition 1 readily gives

$$E(\hat{\alpha}|\beta) = E(E(\hat{\alpha}|X, \beta)|\beta) \quad (25)$$

$$= E(\hat{R}\beta|\beta) \quad (26)$$

$$= R\beta. \quad (27)$$

Application of the law of total covariance yields

$$\text{cov}(\hat{\alpha}|\beta) = E(\text{cov}(\hat{\alpha}|X, \beta)|\beta) + \text{cov}(E(\hat{\alpha}|X, \beta)|\beta) \quad (28)$$

$$\sigma_e^2 \frac{\hat{R}}{N} + \text{cov}(\hat{R}\beta|\beta). \quad (29)$$

It is left then only to analyze  $\text{cov}(\hat{R}\beta|\beta) = E(\hat{R}\beta\beta^T \hat{R}) - R\beta\beta^T R$ . To do so, we note that

$$\text{cov}(\hat{R}\beta|\beta)_{mm'} = \left( E(\hat{R}\beta\beta^T \hat{R}) - R\beta\beta^T R \right)_{mm'} \quad (30)$$

$$= \sum_{i,j} \left( E(\hat{R}_{mi}\beta_i\beta_j\hat{R}_{jm'}) - R_{mi}\beta_i\beta_j R_{jm'} \right) \quad (31)$$

$$= \sum_{i,j} \beta_i\beta_j \left( E(\hat{R}_{mi}\hat{R}_{m'j}) - R_{mi}R_{m'j} \right) \quad (32)$$

$$= \frac{1}{N} \sum_{i,j} \beta_i\beta_j (R_{mm'}R_{ij} + R_{mj}R_{m'i}) \quad (33)$$

$$= \frac{1}{N} R_{mm'} \sum_{i,j} \beta_i\beta_j R_{ij} + \frac{1}{N} \sum_{i,j} \beta_i\beta_j R_{mj}R_{m'i} \quad (34)$$

$$= \frac{1}{N} R_{mm'}\beta^T R\beta + \frac{1}{N} \sum_{i,j} \beta_i\beta_j R_{mj}R_{m'i} \quad (35)$$

where Equation 33 follows from the fact that for Gaussian genotypes, Isselis' theorem implies that

$$E(\hat{R}_{mi}\hat{R}_{m'j}) = R_{mi}R_{m'j} + \frac{1}{N}(R_{mm'}R_{ij} + R_{mj}R_{m'i}). \quad (36)$$

The result of this argument can be summarized across all pairs of SNPs  $m, m'$  by

$$\text{cov}(\hat{R}\beta|\beta) = \frac{1}{N} ((\beta^T R\beta)R + R\beta\beta^T R), \quad (37)$$

whereupon noticing that  $\beta^T R\beta + \sigma_e^2 = \text{var}(y_n) = 1$  completes the proof.  $\square$

**Corollary 1.** *Under the model defined above,  $\hat{\alpha}$  approximately satisfies*

$$\hat{\alpha}|\beta \sim \left[ R\beta, \frac{R}{N} \right] \quad (38)$$

where  $R = \text{cov}(x_n) \in \mathbb{R}^{M \times M}$  is the population covariance matrix of the genotypes.

*Proof.* For a polygenic trait,  $\beta_m \approx O(1/M)$ , and so  $\beta_m\beta_{m'} \approx O(1/M^2)$ . This means that we have that  $(R\beta\beta^T R)_{mm'} = O(k^2/M^2)$  where  $k$  is the number of SNPs in non-zero LD with both SNP  $m$  and SNP  $m'$ . Since  $k \ll M$ ,  $k^2/M^2$  is very small compared to  $R_{mm'}$ .  $\square$

We remark that the above argument does indeed require a polygenic trait. In the other extreme of a trait determined entirely by the value of one SNP,  $R\beta\beta^T R$  can take on large values around the single causal SNP.

## Derivation for random $X$ and random $\beta$

We now assume the full signed LD profile regression model, i.e., we fix some signed annotation  $v \in \mathbb{R}^M$ , and let  $\beta \sim [\mu v, \sigma^2]$ . Under this model, we have the following result.

**Theorem 1.** *If  $\beta \sim [\mu v, \sigma^2]$  for some  $v \in \mathbb{R}^M$  and  $\sigma^2 > 0$ , then  $\hat{\alpha}$  approximately satisfies*

$$\hat{\alpha}|v \sim \left[ \mu R v, \sigma^2 R^2 + \frac{R}{N} \right] \quad (39)$$

where  $R = \text{cov}(x_n) \in \mathbb{R}^{M \times M}$  is the population covariance matrix of the genotypes.

*Proof.* The law of total expectation applied to the result of Corollary 1 yields  $E(\hat{\alpha}|v) = \mu R v$  as desired. The law of total covariance yields

$$\text{cov}(\hat{\alpha}|v) \approx E(\text{cov}(\hat{\alpha}|\beta)|v) + \text{cov}(E(\hat{\alpha}|\beta)|v) \quad (40)$$

$$= \frac{R}{N} + \text{cov}(R\beta|v) \quad (41)$$

$$= \frac{R}{N} + R \text{cov}(\beta|v) R \quad (42)$$

$$= \frac{R}{N} + \sigma^2 R^2 \quad (43)$$

as desired. □

## References

- [1] Brendan Bulik-Sullivan et al. “An Atlas of Genetic Correlations across Human Diseases and Traits”. In: *Nature genetics* 47.11 (Nov. 2015), pp. 1236–1241. ISSN: 1061-4036. DOI: 10.1038/ng.3406. pmid: 26414676. URL: <http://www.ncbi.nlm.nih.gov/pmc/articles/PMC4797329/>.
- [2] Hilary K. Finucane et al. “Partitioning Heritability by Functional Annotation Using Genome-Wide Association Summary Statistics”. In: *Nature Genetics* 47.11 (Nov. 2015), pp. 1228–1235. ISSN: 1061-4036. DOI: 10.1038/ng.3404. URL: <http://www.nature.com/ng/journal/v47/n11/full/ng.3404.html#/introduction> (visited on 06/17/2017).
- [3] Tomaz Berisa and Joseph K. Pickrell. “Approximately Independent Linkage Disequilibrium Blocks in Human Populations”. In: *Bioinformatics* 32.2 (Jan. 15, 2016), pp. 283–285. ISSN: 1367-4803. DOI: 10.1093/bioinformatics/btv546. pmid: 26395773. URL: <http://www.ncbi.nlm.nih.gov/pmc/articles/PMC4731402/>.
- [4] Armin Schoech et al. “Quantification of Frequency-Dependent Genetic Architectures and Action of Negative Selection in 25 UK Biobank Traits”. In: *bioRxiv* (Sept. 13, 2017), p. 188086. DOI: 10.1101/188086. URL: <https://www.biorxiv.org/content/early/2017/09/13/188086> (visited on 10/02/2017).
- [5] Sarah Gallant and Gary Gilkeson. “ETS Transcription Factors and Regulation of Immunity”. In: *Archivum Immunologiae et Therapiae Experimentalis* 54.3 (June 1, 2006), pp. 149–163. ISSN: 0004-069X, 1661-4917. DOI: 10.1007/s00005-006-0017-z. URL: <https://link-springer-com/article/10.1007/s00005-006-0017-z> (visited on 10/12/2017).
- [6] K Yamazaki et al. “A Genome-Wide Association Study Identifies 2 Susceptibility Loci for Crohn’s Disease in a Japanese Population.” In: *Gastroenterology* 144.4 (Apr. 2013), pp. 781–788. ISSN: 0016-5085. DOI: 10.1053/j.gastro.2012.12.021. pmid: 23266558. URL: <http://europepmc.org/abstract/MED/23266558> (visited on 05/03/2017).
- [7] Yuta Fuyuno et al. “Genetic Characteristics of Inflammatory Bowel Disease in a Japanese Population”. In: *Journal of Gastroenterology* 51.7 (July 2016), pp. 672–681. ISSN: 1435-5922. DOI: 10.1007/s00535-015-1135-3. pmid: 26511940.

- [8] Tamas Varga, Zsolt Czimmerer, and Laszlo Nagy. “PPARs Are a Unique Set of Fatty Acid Regulated Transcription Factors Controlling Both Lipid Metabolism and Inflammation”. In: *Biochimica et Biophysica Acta* 1812.8 (Aug. 2011), pp. 1007–1022. ISSN: 0006-3002. DOI: 10.1016/j.bbadis.2011.02.014. pmid: 21382489. URL: <https://www.ncbi.nlm.nih.gov/pmc/articles/PMC3117990/>.
- [9] Joana Torres, Silvio Danese, and Jean-Frédéric Colombel. “New Therapeutic Avenues in Ulcerative Colitis: Thinking out of the Box”. In: *Gut* 62.11 (Nov. 1, 2013), pp. 1642–1652. ISSN: 0017-5749, 1468-3288. DOI: 10.1136/gutjnl-2012-303959. pmid: 24104885. URL: <http://gut.bmj.com/content/62/11/1642> (visited on 04/12/2018).
- [10] David Ellinghaus et al. “Analysis of Five Chronic Inflammatory Diseases Identifies 27 New Associations and Highlights Disease-Specific Patterns at Shared Loci”. In: *Nature Genetics* 48.5 (May 2016), pp. 510–518. ISSN: 1546-1718. DOI: 10.1038/ng.3528. URL: <https://www.nature.com/articles/ng.3528> (visited on 04/12/2018).
- [11] Katrina M. de Lange et al. “Genome-Wide Association Study Implicates Immune Activation of Multiple Integrin Genes in Inflammatory Bowel Disease”. In: *Nature Genetics* 49.2 (Feb. 2017), pp. 256–261. ISSN: 1546-1718. DOI: 10.1038/ng.3760. URL: <https://www.nature.com/articles/ng.3760> (visited on 04/12/2018).
- [12] Ye Tian et al. “C. Elegans Screen Identifies Autophagy Genes Specific to Multicellular Organisms”. In: *Cell* 141.6 (June 11, 2010), pp. 1042–1055. ISSN: 1097-4172. DOI: 10.1016/j.cell.2010.04.034. pmid: 20550938.
- [13] Pearl P. C. Toh et al. “Myc Inhibition Impairs Autophagosome Formation”. In: *Human Molecular Genetics* 22.25 (Dec. 20, 2013), pp. 5237–5248. ISSN: 0964-6906. DOI: 10.1093/hmg/ddt381. URL: <https://academic.oup.com/hmg/article/22/25/5237/576587> (visited on 04/12/2018).
- [14] Franz X. Schaub et al. “Myc-Directed Suppression of Autophagy Provides Therapeutic Vulnerabilities Targeting Amino Acid Homeostasis”. In: *Blood* 126.23 (Dec. 3, 2015), pp. 2450–2450. ISSN: 0006-4971, 1528-0020. URL: <http://www.bloodjournal.org/content/126/23/2450> (visited on 04/12/2018).
- [15] Paul Henderson and Craig Stevens. “The Role of Autophagy in Crohn’s Disease”. In: *Cells* 1.3 (Aug. 3, 2012), pp. 492–519. ISSN: 2073-4409. DOI: 10.3390/cells1030492. pmid: 24710487. URL: <https://www.ncbi.nlm.nih.gov/pmc/articles/PMC3901108/>.
- [16] Latifa Bakiri et al. “Liver Carcinogenesis by FOS-Dependent Inflammation and Cholesterol Dysregulation”. In: *Journal of Experimental Medicine* (Mar. 29, 2017), jem.20160935. ISSN: 0022-1007, 1540-9538. DOI: 10.1084/jem.20160935. pmid: 28356389. URL: <http://jem.rupress.org/content/early/2017/03/28/jem.20160935> (visited on 10/12/2017).
- [17] Fabian Bartz et al. “Identification of Cholesterol-Regulating Genes by Targeted RNAi Screening”. In: *Cell Metabolism* 10.1 (July 8, 2009), pp. 63–75. ISSN: 1550-4131. DOI: 10.1016/j.cmet.2009.05.009. URL: <http://www.sciencedirect.com/science/article/pii/S1550413109001570>.
- [18] J. Kálmán et al. “High Cholesterol Diet down Regulates the Activity of Activator Protein-1 but Not Nuclear Factor-Kappa B in Rabbit Brain”. In: *Life Sciences* 68.13 (Feb. 16, 2001), pp. 1495–1503. ISSN: 0024-3205. pmid: 11253166.
- [19] Birgit Knebel et al. “A Mutation in the C-Fos Gene Associated with Congenital Generalized Lipodystrophy”. In: *Orphanet Journal of Rare Diseases* 8 (Aug. 7, 2013), p. 119. ISSN: 1750-1172. DOI: 10.1186/1750-1172-8-119. URL: <https://doi.org/10.1186/1750-1172-8-119>.
- [20] Shuichi Fujioka et al. “NF- $\kappa$ B and AP-1 Connection: Mechanism of NF- $\kappa$ B-Dependent Regulation of AP-1 Activity”. In: *Molecular and Cellular Biology* 24.17 (Sept. 2004), pp. 7806–7819. ISSN: 0270-7306. DOI: 10.1128/MCB.24.17.7806-7819.2004. pmid: 15314185. URL: <https://www.ncbi.nlm.nih.gov/pmc/articles/PMC507000/>.
- [21] F. Jeffrey Field, Kim Watt, and Satya N. Mathur. “TNF-Alpha Decreases ABCA1 Expression and Attenuates HDL Cholesterol Efflux in the Human Intestinal Cell Line Caco-2”. In: *Journal of Lipid Research* 51.6 (June 2010), pp. 1407–1415. ISSN: 1539-7262. DOI: 10.1194/jlr.M002410. pmid: 20103810.



- [22] Laura A. Warg et al. “The Role of the E2F1 Transcription Factor in the Innate Immune Response to Systemic LPS”. In: *American Journal of Physiology. Lung Cellular and Molecular Physiology* 303.5 (Sept. 2012), pp. L391–400. ISSN: 1522-1504. DOI: 10.1152/ajplung.00369.2011. pmid: 22707615.
- [23] Lei Ying et al. “Chronic Inflammation Promotes Retinoblastoma Protein Hyperphosphorylation and E2F1 Activation”. In: *Cancer Research* 65.20 (Oct. 15, 2005), pp. 9132–9136. ISSN: 0008-5472. DOI: 10.1158/0008-5472.CAN-05-1358. pmid: 16230367.
- [24] Rossana Colla Soletti et al. “Immunohistochemical Analysis of Retinoblastoma and  $\beta$ -Catenin as an Assistant Tool in the Differential Diagnosis between Crohn’s Disease and Ulcerative Colitis”. In: *PLOS ONE* 8.8 (Aug. 14, 2013), e70786. ISSN: 1932-6203. DOI: 10.1371/journal.pone.0070786. URL: <http://journals.plos.org/plosone/article?id=10.1371/journal.pone.0070786> (visited on 10/13/2017).
- [25] Carrie A. Davis et al. “The Encyclopedia of DNA Elements (ENCODE): Data Portal Update”. In: *Nucleic Acids Research* 46 (D1 Jan. 4, 2018), pp. D794–D801. ISSN: 1362-4962. DOI: 10.1093/nar/gkx1081. pmid: 29126249.
- [26] Hilde Schjerven et al. “Genetic Analysis of Ikaros Target Genes and Tumor Suppressor Function in BCR-ABL1+ Pre-B ALL”. In: *The Journal of Experimental Medicine* 214.3 (Mar. 6, 2017), pp. 793–814. ISSN: 1540-9538. DOI: 10.1084/jem.20160049. pmid: 28190001.
- [27] Chunhua Song et al. “Targeting Casein Kinase II Restores Ikaros Tumor Suppressor Activity and Demonstrates Therapeutic Efficacy in High-Risk Leukemia”. In: *Blood* 126.15 (Oct. 8, 2015), pp. 1813–1822. ISSN: 1528-0020. DOI: 10.1182/blood-2015-06-651505. pmid: 26219304.
- [28] Shenglin Mei et al. “Cistrome Data Browser: A Data Portal for ChIP-Seq and Chromatin Accessibility Data in Human and Mouse”. In: *Nucleic Acids Research* 45 (D1 Jan. 4, 2017), pp. D658–D662. ISSN: 1362-4962. DOI: 10.1093/nar/gkw983. pmid: 27789702.
- [29] Katerina Hatzi et al. “A Hybrid Mechanism of Action for BCL6 in B Cells Defined by Formation of Functionally Distinct Complexes at Enhancers and Promoters”. In: *Cell Reports* 4.3 (Aug. 15, 2013), pp. 578–588. ISSN: 2211-1247. DOI: 10.1016/j.celrep.2013.06.016. pmid: 23911289.
- [30] Chuanxin Huang, Katerina Hatzi, and Ari Melnick. “Lineage-Specific Functions of Bcl-6 in Immunity and Inflammation Are Mediated by Distinct Biochemical Mechanisms”. In: *Nature Immunology* 14.4 (Apr. 2013), pp. 380–388. ISSN: 1529-2916. DOI: 10.1038/ni.2543. pmid: 23455674.
- [31] Christian Hurtz et al. “BCL6-Mediated Repression of P53 Is Critical for Leukemia Stem Cell Survival in Chronic Myeloid Leukemia”. In: *The Journal of Experimental Medicine* 208.11 (Oct. 24, 2011), pp. 2163–2174. ISSN: 1540-9538. DOI: 10.1084/jem.20110304. pmid: 21911423.
- [32] Srividya Swaminathan et al. “BACH2 Mediates Negative Selection and P53-Dependent Tumor Suppression at the Pre-B Cell Receptor Checkpoint”. In: *Nature Medicine* 19.8 (Aug. 2013), pp. 1014–1022. ISSN: 1546-170X. DOI: 10.1038/nm.3247. pmid: 23852341.
- [33] R John Simes. “An Improved Bonferroni Procedure for Multiple Tests of Significance”. In: *Biometrika* 73.3 (1986), pp. 751–754.
- [34] Abraham S. Weintraub et al. “YY1 Is a Structural Regulator of Enhancer-Promoter Loops”. In: *Cell* 171.7 (Dec. 14, 2017), 1573–1588.e28. ISSN: 0092-8674, 1097-4172. DOI: 10.1016/j.cell.2017.11.008. pmid: 29224777. URL: [http://www.cell.com/cell/abstract/S0092-8674\(17\)31317-X](http://www.cell.com/cell/abstract/S0092-8674(17)31317-X) (visited on 04/12/2018).
- [35] Huwenbo Shi, Gleb Kichaev, and Bogdan Pasaniuc. “Contrasting the Genetic Architecture of 30 Complex Traits from Summary Association Data”. In: *The American Journal of Human Genetics* 99.1 (July 7, 2016), pp. 139–153. ISSN: 0002-9297, 1537-6605. DOI: 10.1016/j.ajhg.2016.05.013. pmid: 27346688. URL: [http://www.cell.com/ajhg/abstract/S0002-9297\(16\)30148-3](http://www.cell.com/ajhg/abstract/S0002-9297(16)30148-3) (visited on 06/17/2017).
